# Supplementary material for: Nondestructive enzymatic deamination enables single-molecule long-read amplicon sequencing for the determination of 5-methylcytosine and 5-hydroxymethylcytosine at single-base resolution
Source: PubMed Central journal article supplement — Genome Res. 2021 Feb;31(2):291–300. doi: 10.1101/gr.265306.120 (PMC7849414; doi:10.1101/gr.265306.120), 2021-02
Supplement: supp_gr.265306.120_Supplemental_Fig_S5.pdf [file supp_gr.265306.120_Supplemental_Fig_S5.pdf]

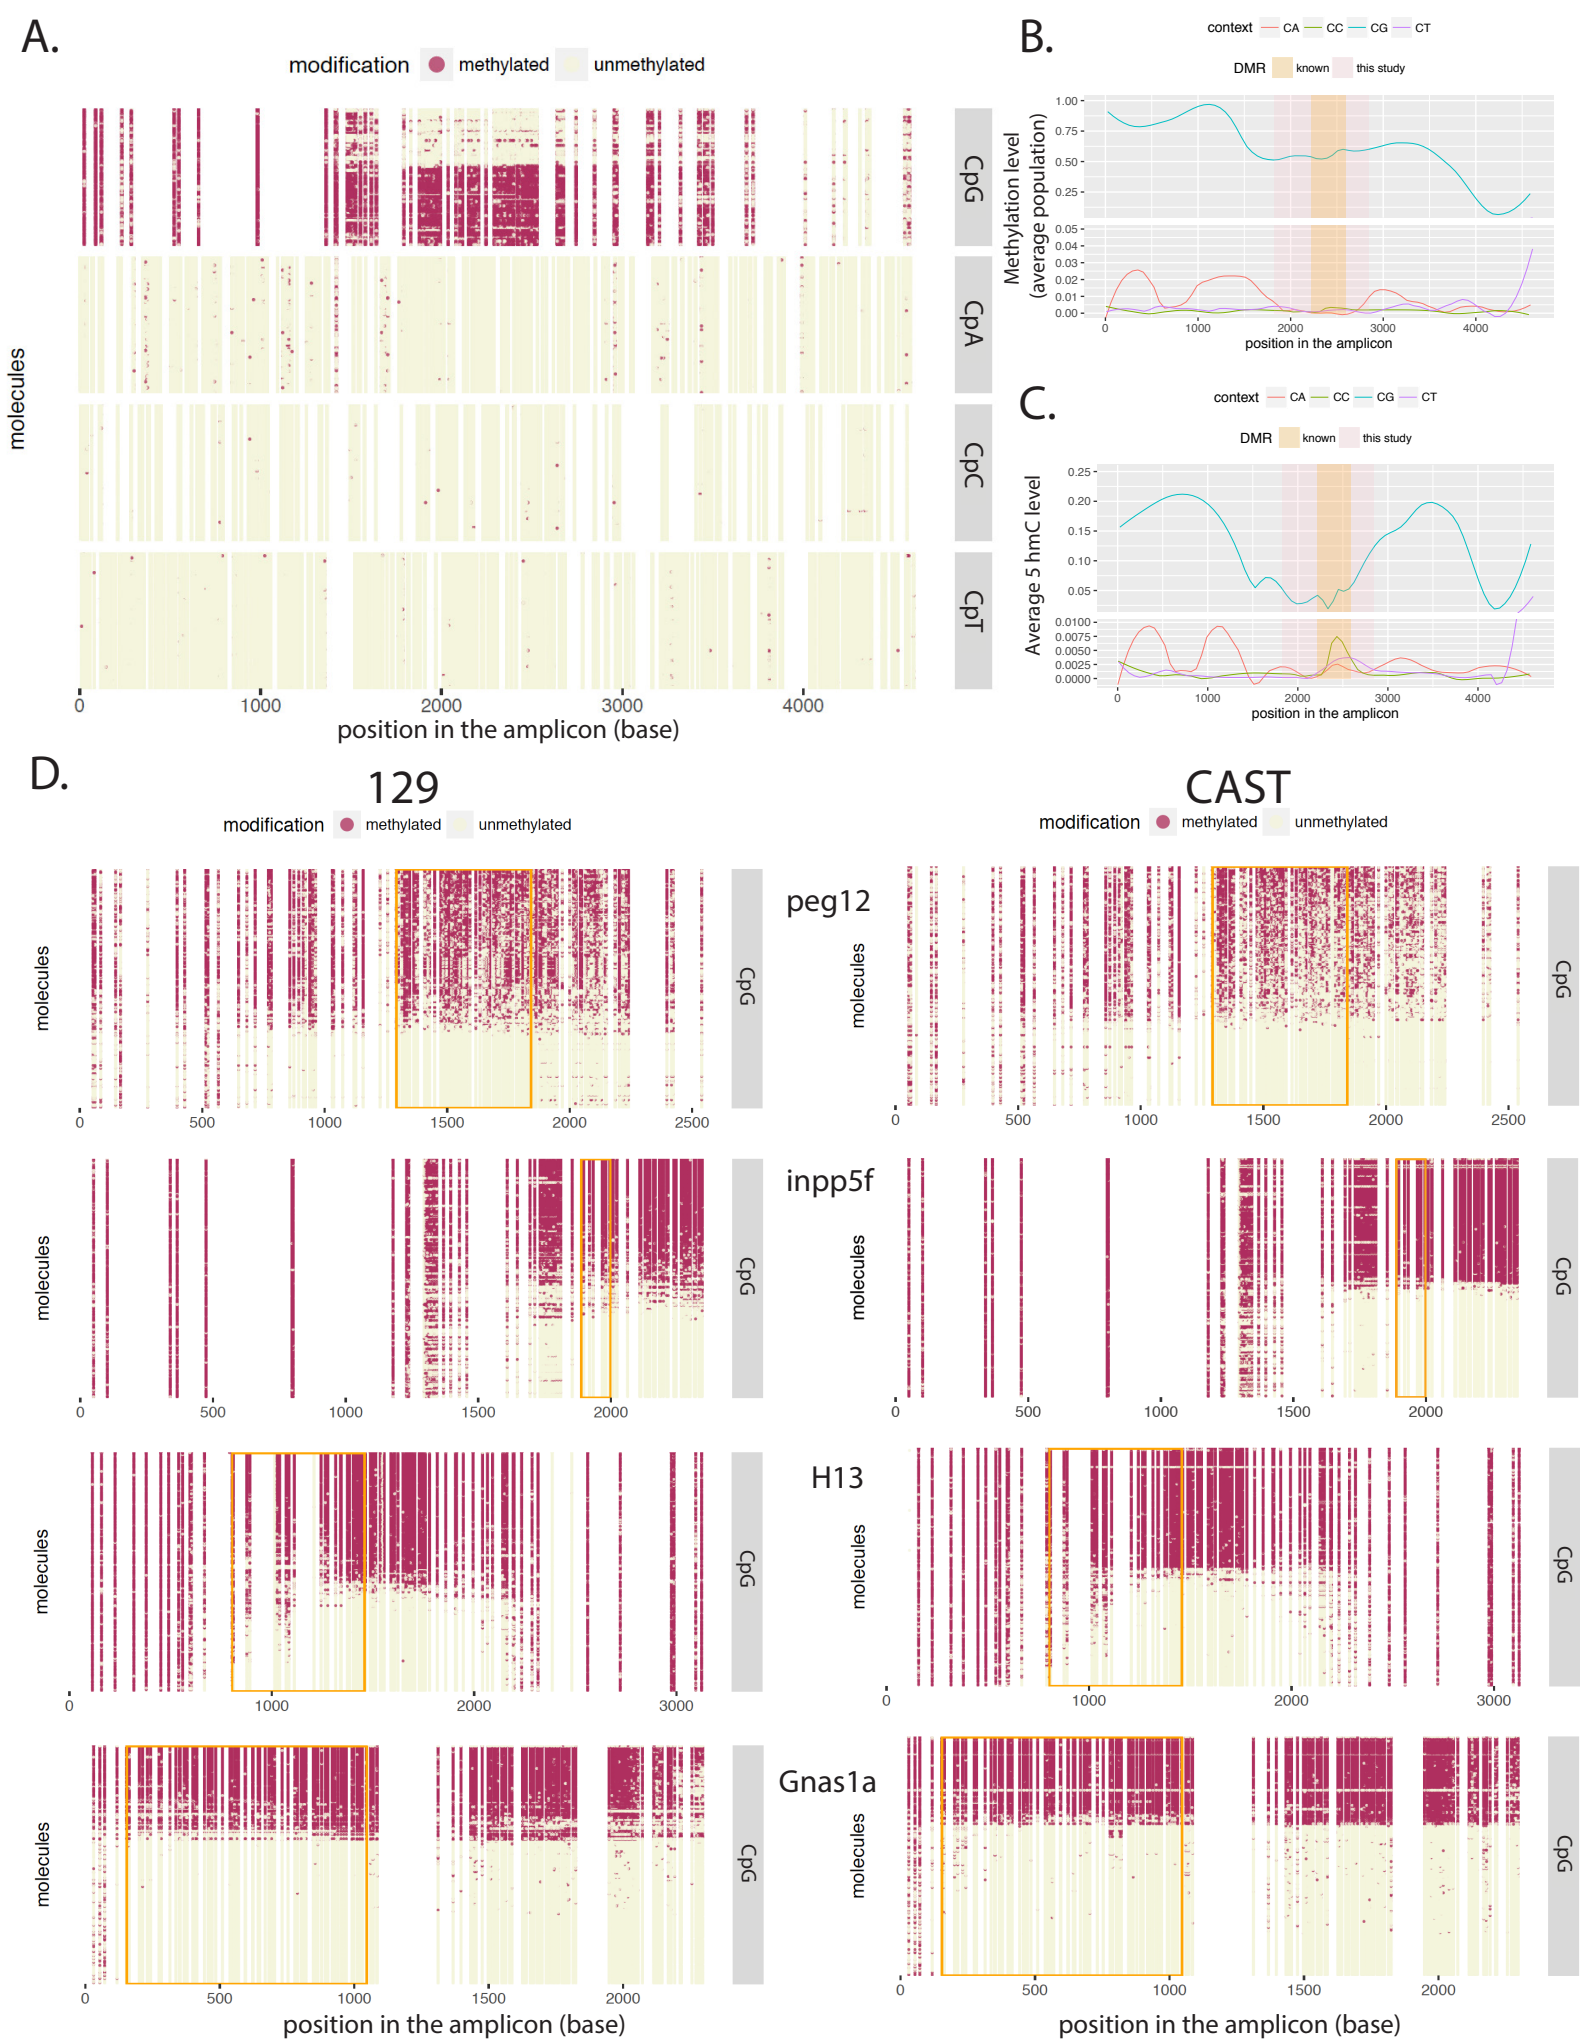

### Supplemental Figure 5

**(A)** Methylation states (beige: unmethylated; red: methylated) of individual cytosines at each dinucleotide context (CpG, CpA, CpC, CpT) at single molecule level of the 4.6kb amplicon in the imprinted *Inpp5f\_v2* locus. CpA methylation (2nd panel) appears to be completely missing from the imprinted DMR (observable in the top panel). **(B)** Trend plot showing the population level methylation abundance of each cytosine dinucleotide context in the amplified region of *Inpp5f\_v2* gene. CpA methylation (red) appears to be lower in the DMR compared to the surrounding region. **(C)** Trend plot showing the population level hydroxymethylation abundance of each cytosine dinucleotide context in *Inpp5f\_v2* amplicon. **(D)** Methylation states (beige: unmethylated; red: methylated) of individual CpG sites at single molecule level of 4 previously reported DMR regions from two mouse inbred strains: Cast/EiJ (CAST, Right) and 129X1/SvJ (129, left).
