# Supplementary material for: Nondestructive enzymatic deamination enables single-molecule long-read amplicon sequencing for the determination of 5-methylcytosine and 5-hydroxymethylcytosine at single-base resolution
Source: HighWire-hosted journal article supplement (doi:10.1101/gr.265306.120), 2021-01-19
Supplement: Supplemental_Data_S1.docx [file Supplemental_Data_S1.docx]

**Supplemental data S1. Sanger Sequences used in Figure 2 (*D*)**

Sanger sequences of 731 bp amplicons from the E14 genomic DNA used in Figure 2D. CpG’s in the original sequence are shown in red.

Original mouse E14 731 bp sequence

AGACACACTGGAGAAGTCTTGGATGACTTGGGGACCTTGACTATACAGGTCCCAAGCAGGTCCTATCCTACCCTAAACAGCAAGAAACTCTCAACAATCCCATTCAGAAGGTATTGCCCCCATCAGCTTCCTGGAGCTCCTCCCACACCGCACGCTGGGCCAGGCACATGGCCGCTCATCCCTCTCAGCCCTCACAGCACAGAGCAGGGCAGGCCACCCCACCATGCTGCACACAGGAAGCACTGGCACTGCTGGCGTGAGTGGCGTGTGCCCGCCTGCTACCACTTGACTGCCGACCAGGATGATGGGGACAGCAGAGGCCAGGGGCAGGAAGGAAAAGGGTCAGGACAAAAACACAAATGCACTGTGGGATGAGGAAAAGGAACAGAGAACCTGGCCCCATTGGAGACCACAACAGAAGGCGACACAGCTTTGTCCCTGTTTCCTTACCCTGAATGACTCCAGTTCCTTCTCAGTGAAGTTGGCAGACTGAGCCAGGTCCCACAGATCTATCACCCGGGGCTCTTCAAACTCTGCAGGAGAGCAAGGGCTGTCTATAGGTGGCAAGTCAGGACACACCTCGGTGCTGGGGGCCAAGTGGCTTGTCATCCCAAGGGAATAGTGTGGGTTGCAACTTGGGAGCACTAAGTACCTGGTCTGTGCTCACAGCTCCAGCTTAGATGCAGCTTGATTGAAACCCGGCTGCACCAGTGGAGGGGGTCACATGCTCT

Bisulfite converted DNA sequences

>01

AGATATATTGGAGAAGTTTTGGATGATTTGGGGATTTTGATTATATAGGTTTTAAGTAGGTTTTATTTTATTTTAAATAGTAAGAAATTTTTAATAATTTTATTTAGAAGGTATTGTTTTTATTAGTTTTTTGGAGTTTTTTTTATATCGTACGTTGGGTTAGGTATATGGTTGTTTATTTTTTTTAGTTTTTATAGTATAGAGTAGGGTAGGTTATTTTATTATGTTGTATATAGGAAGTATTGGTATTGTTGGTGTGAGTGGTGTGTGTTTGTTTGTTATTATTTGATTGTTGATTAGGATGATGGGGATAGTAGAGGTTAGGGGTAGGAAGGAAAAGGGTTAGGATAAAAATATAAATGTATTGTGGGATGAGGAAAAGGAATAGAGAATTTGGTTTTATTGGAGATTATAATAGAAGGTGATATAGTTTTGTTTTTGTTTTTTTATTTTGAATGATTTTAGTTTTTTTTTAGTGAAGTTGGTAGATTGAGTTAGGTTTTATAGATTTATTATTTGGGGTTTTTTAAATTTTGTAGGAGAGTAAGGGTTGTTTATAGGTGGTAAGTTAGGATATATTTTGGTGTTGGGGGTTAAGTGGTTTGTTATTTTAAGGGAATAGTGTGGGTTGTAATTTGGGAGTATTAAGTATTTGGTTTGTGTTTATAGTTTTAGTTTAGATGTAGTTTGATTGAAATTTGGTTGTATTAGTGGAGGGGGTTATATGTTTT

>02

AGATATATTGGAGAAGTTTTGGATGATTTGGGGATTTTGATTATATAGGTTTTAAGTAGGTTTTATTTTATTTTAAATAGTAAGAAATTTTCAATAATTTTATTTAGAAGGTATTGTTTTTATTAGTTTTTTGGAGTTTTTTTTATATCGTATGTTGGGTTAGGTATATGGTCGTTTATTTTTTTTAGTTTTTATAGTATAGAGTAGGGTAGGTTATTTTATTATGTTGTATATAGGAAGTATTGGTATTGTTGGTGTGAGTGGCGTGTGTTCGTTTGTTATTATTTGATTGTCGATTAGGATGATGGGGATAGTAGAGGTTAGGGGTAGGAAGGAAAAGGGTTAGGATAAAAATATAAGTGTATTGTGGGATGAGGAAAAGGAATAGAGAATTTGGTTTTATTGGAGATTATAATAGAAGGCGATATAGTTTTGTTTTTGTTTTTTTATTTTGAATGATTTTAGTTTTTTTTTAGTGAAGTTGGTAGATTGAGTTAGGTTTTATAGATTTATTATTTGGGGTTTTTTAAATTTTGTAGGAGAGTAAGGGTTGTTTATAGGTGGTAAGTTAGGATATATTTTGGTGTTGGGGGTTAAGTGGTTTGTTATTTTAAGGGAATAGTGTGGGTTGTAATTTGGGAGTATTAAGTATTTGGTTTGTGTTTATAGTTTTAGTTTAGATGTAGTTTGATTGAAATTCGGTTGTATTAGTGGAGGGGGTTATATGTTTT

>03

AGATATATTGGAGAAGTTTTGGATGATTTGGGGATTTTGATTATATAGGTTTTAAGTAGGTTTTGTTTTATTTTAAATAGTAAGAAATTTTTAATAATTTTATTTAGAAGGTATTGTTTTTATTAGTTTTTTGGAGTTTTTTTTATATTGTATGTTGGGTTAGGTATATGGTTGTTTATTTTTTTTAGTTTTTATAGTATAGAGTAGGGTAGGTTATTTTATTATGTTGTATATAGGAAGTATTGGTATTGTTGGTGTGAGTGGTGTGTGTTCGTTTGTTATTATTTGATTGTTGATTAGGATGATGGGGATAGTAGAGGTTAGGGGTAGGAAGGAAAAGGGTTAGGATAAAAATATAAATGTATTGTGGGATGAGGAAAAGGAATAGAGAATTTGGTTTTATTGGAGATTATAATAGAAGGTGATATAGTTTTGTTTTTGTTTTTTTATTTTGAATGATTTTAGTTTTTTTTTAGTGAAGTTGGTAGATTGAGTTAGGTTTTATAGATTTATTATTCGGGGTTTTTTAAATTTTGTAGGAGAGTAAGGGTTGTTTATAGGTGGTAAGTTAGGATATATTTTGGTGTTGGGGGTTAAGTGGTTTGTTATTTTAAGGGAATAGTGTGGGTTGTAATTTGGGAGTATTAAGTATTTGGTTTGTGTTTATAGCTTTAGTTTAGATGTAGTTTGATTGAAATTTGGTTGTATTAGTGGAGGGGGTTATATGTTTT

>04

AGATATATTGGAGAAGTTTTGGATGATTTGGGGATTTTGATTATATAGGTTTTAAGTAGGTTTTATTTTATTTTAAACAGTAAGAAATTTTTAATAATTTTATTTAGAAGGTATTGTTTTTATTAGTTTTTTGGAGTTTTTTTTATATTGTATGTTGGGTTAGGTATATGGTTGTTTATTTTTTTTAGTTTTTATAGTATAGAGTAGGGTAGGTTATTTTATTATGTTGTATATAGGAAGTATTGGTATTGTTGGTGTGAGTGGCGTGTGTTCGTTTGTTATTATTTGATTGTCGATTAGGATGATGGGGATAGTAGAGGTTAGGGGTAGGAAGGAAAAGGGTTAGGATAAAAATATAAATGTATTGTGGGATGAGGAAAAGGAATAGAGAATTTGGTTTTATTGGAGATTATAATAGAAGGTGACATAGTTTTGTTTTTGTTTTTTTATTTTGAATGATTTTAGTTTTTTTTTAGTGAAGTTGGTAGATTGAGTTAGGTTTTATAGATTTATTATTCGGGGTTTTTTAAATTTTGTAGGAGAGTAAGGGTTGTTTATAGGTGGTAAGTTAGGATATATTTCGGTGTTGGGGGTTAAGTGGTTTGTTATTTTAAGGGAATAGTGTGGGTTGTAATTTGGGAGTATTAAGTATTTGGTTTGTGTTTATAGTTCTAGTTTAGATGTAGTTTGATTGAAATTCGGTTGTATTAGTGGAGGGGGTTATATGTTTT

>05

AGATATATTGGAGAAGTTTTGGATGATTTGGGGATTTTGATTATATAGGTTTTAAGTAGGTTTTATTTTATTTTAAATAGTAAGAAATTTTTAATAATTTTATTTAGAAGGTATTGTTTTTATTAGTTTTTTGGAGTTTTTTTTATATCGTACGTTGGGTTAGGTATATGGTTGTTTATTTTTTTTAGTTTTTATAGTATAGAGTAGGGTAGGTTATTTTATTATGTTGTATATAGGAAGTATTGGTATTGTTGGTGTGAGTGGTGTGTGTTTGTTTGTTATTATTTGATTGTTGATTAGGATGATGGGGATAGTAGAGGTTAGGGGTAGGAAGGAAAAGGGTTAGGATAAAAATATAAATGTATTGTGGGATGAGGAAAAGGAATAGAGAATTTGGTTTTATTGGAGATTATAATAGAAGGTGATATAGTTTTGTTTTTGTTTTTTTATTTTGAATGATTTTAGTTTTTTTTTAGTGAAGTTGGTAGATTGAGTTAGGTTTCATAGATTTATTATTTGGGGTTTTTTAAATTTTGTAGGAGAGTAAGGGTTGTTTATAGGTGGTAAGTTAGGATATATTTTGGTGTTGGGGGTTAAGTGGTTTGTTATTTTAAGGGAATAGTGTGGGTTGTAATTTGGGAGTATTAAGTATTTGGTTTGTGTTTATAGTTTTAGTTTAGATGTAGTTTGATTGAAATTTGGTTGTATTAGTGGAGGGGGTTATATGTTTT

>06

AGATATATTGGAGAAGTTTTGGATGATTTGGGGATTTTGATTATATAGGTTTTAAGTAGGTTTTATTTTATTTTAAATAGTAAGAAATTTTTAATAATTTTATTTAGAAGGTATTGTTTTTATTAGTTTTTTGGAGTTTTTTTTATATTGTATGTTGGGTTAGGTATATGGTTGTTTATTTTTTTTAGTTTTTATAGTATAGAGTAGGGTAGGTTATTTTATTATGTTGTATATAGGAAGTATTGGTATTGTTGGTGTGAGTGGTGTGTGTTTGTTTGTTATTATTTGATTGTTGATTAGGATGATGGGGATAGTAGAGGTTAGGGGTAGGAAGGAAAAGGGTTAGGATAAAAATATAAATGTATTGTGGGATGAGGAAAAGGAATAGAGAATTTGGTTTTATTGGAGATTATAATAGAAGGTGATATAGTTTTGTTTTTGTTTTTTTATTTTGAATGATTTTAGTTTTTTTTTAGTGAAGTTGGTAGATTGAGTTAGGTTTTATAGATTTATTATTTGGGGTTTTTTAAATTTTGTAGGAGAGTAAGGGTTGTTTATAGGTGGTAAGTTAGGATATATTTTGGTGTTGGGGGTTAAGTGGTTTGTTATTTTAAGGGAATAGTGTGGGTTGTAATTTGGGAGTATTAAGTATTTGGTTTGTGTTTATAGTTTTAGTTTAGATGTAGTTTGATTGAAATTTGGTTGTATTAGTGGAGGGGGTTATATGTTTT

>07

AGATATATTGGAGAAGTTTTGGATGATTTGGGGATTTTGATTATATAGGTTTTAAGTAGGTTTTATTTTATTTTAAATAGTAAGAAATTTTTAATAATTTTATTTAGAAGGTATTGTTTTTATTAGTTTTTTGGAGTTTTTTTTATATCGTACGTTGGGTTAGGTATATGGTCGTTTATTTTTTTCAGTTTTTATAGTATAGAGTAGGGTAGGTTATTTTATTATGTTGTATATAGGAAGTATTGGTATTGTTGGCGTGAGTGGCGTGTGTTCGTTTGTTATTATTTGATTGTCGATTAGGATGATGGGGATAGTAGAGGTTAGGGGTAGGAAGGAAAAGGGTTAGGATAAAAATATAAATGTATTGTGGGATGAGGAAAAGGAATAGAGAATTTGGTTTTATTGGAGATTATAATAGAAGGCGATATAGTTTTGTTTTTGTTTTTTTATTTTGAATGATTTTAGTTTTTTTTTAGTGAAGTTGGTAGATTGAGTTAGGTTTTATAGATTTATTATTCGGGGTTTTTTAAATTTTGTAGGAGAGTAAGGGTTGTTTATAGGTGGTAAGTTAGGATATATTTCGGTGTTGGGGGTTAAGTGGTTTGTTATTTTAAGGGAATAGTGTGGGTTGTAATTTGGGAGTATTAAGTATTTGGTTTGTGTTTATAGTTTTAGTTTAGATGTAGTTTGATTGAAATTCGGTTGTATTAGTGGAGGGGGTTATATGTTTT

>08

AGATATATTGGAGAAGTTTTGGATGATTTGGGGATTTTGATTATATAGGTTTTAAGTAGGTTTTATTTTATTTTAAATAGTAAGAAATTTTCAATAATTTTATTTAGAAGGTATTGTTTTTATTAGTTTTTTGGAGTTTTTTTTATATCGTATGTTGGGTTAGGTATATGGTCGTTTATTTTTTTTAGTTTTTATAGTATAGAGTAGGGTAGGTTATTTTATTATGTTGTATATAGGAAGTATTGGTATTGTTGGTGTGAGTGGCGTGTGTTCGTTTGTTATTATTTGATTGTCGATTAGGATGATGGGGATAGTAGAGGTTAGGGGTAGGAAGGAAAAGGGTTAGGATAAAAATATAAGTGTATTGTGGGATGAGGAAAAGGAATAGAGAATTTGGTTTTATTGGAGATTATAATAGAAGGCGATATAGTTTTGTTTTTGTTTTTTTATTTTGAATGATTTTAGTTTTTTTTTAGTGAAGTTGGTAGATTGAGTTAGGTTTTATAGATTTATTATTTGGGGTTTTTTAAATTTTGTAGGAGAGTAAGGGTTGTTTATAGGTGGTAAGTTAGGATATATTTTGGTGTTGGGGGTTAAGTGGTTTGTTATTTTAAGGGAATAGTGTGGGTTGTAATTTGGGAGTATTAAGTATTTGGTTTGTGTTTATAGTTTTAGTTTAGATGTAGTTTGATTGAAATTTGGTTGTATTAGTGGAGGGGGTTATATGTTTT

>09

AGATATATTGGAGAAGTTTTGGATGATTTGGGGATTTTGATTATATAGGTTTTAAGTAGGTTTTATTTTATTTTAAATAGTAAGAAATTTTTAATAATTTTATTTAGAAGGTATTGTTTTTATTAGTTTTTTGGAGTTTTTTTTATATTGTATGTTGGGTTAGGTATATGGTCGTTTATTTTTTTTAGTTTTTATAGCATAGAGTAGGGTAGGTTATTTTATTATGTTGTATATAGGAAGTATTGGTATTGTTGGTGTGAGTGGTGTGTGTTTGTTTGTTATTATTTGATTGTTGATTAGGATGATGGGGATAGTAGAGGTTAGGGGTAGGAAGGAAAAGGGTTAGGATAAAAATATAAATGTATTGTGGGATGAGGAAAAGGAATAGAGAATTTGGTTTTATTGGAGATTATAATAGAAGGTGATATAGTTTTGTTTTTGTTTTTTTATTTTGAATGATTTTAGTTTTTTTTTAGTGAAGTTGGTAGATTGAGTTAGGTTTTATAGATTTATTATTTGGGGTTTTTTAAATTTTGTAGGAGAGTAAGGGTTGTTTATAGGTGGTAAGTTAGGATATATTTTGGTGTTGGGGGTTAAGTGGTTTGTTATTTTAAGGGAATAGTGTGGGTTGTAATTTGGGAGTATTAAGTATTTGGTTTGTGTTTATAGTTTTAGTTTAGATGTAGTTTGATTGAAATTTGGTTGTATTAGTGGAGGGGGTTATATGTTTT

>10

AGATATATTGGAGAAGTTTTGGATGATTTGGGGATTTTGATTATATAGGTTTTAAGTAGGTTTTATTTTATTTTAAATAGTAAGAAATTTTTAATAATTTTATTTAGAAGGTATTGTTTTTATTAGTTTTTTGGAGTTTTTTTTATATCGTACGTTGGGTTAGGTATATGGTCGTTTATTTTTTTTAGTTTTTATAGTATAGAGTAGGGTAGGTTATTTTATTATGTTGTATATAGGAAGTATTGGTATTGTTGGCGTGAGTGGCGTGTGTTCGTTTGTTATTATTTGATTGTCGATTAGGATGATGGGGATAGTAGAGGTTAGGGGTAGGAAGGAAAAGGGTTAGGATAAAAATATAAATGTATTGTGGGATGAGGAAAAGGAATAGAGAATTTGGTTTTATTGGAGATTATAATAGAAGGTGATATAGTTTTGTTTTTGTTTTTTTATTTTGAATGATTTTAGTTTTTTTTTAGTGAAGTTGGCAGATTGAGTTAGGTTTTATAGATTTATTATTCGGGGTTTTTTAAATTTTGTAGGAGAGTAAGGGTTGTTTATAGGTGGTAAGTTAGGATATATTTCGGTGTTGGGGGTTGAGTGGTTTGTTATTTTAAGGGAATAGTGTGGGTTGTAATTTGGGAGTATTAAGTATTTGGTTTGTGTTTATAGTTTTAGTTTAGATGTAGTTTGATTGAAATTCGGTTGTATTAGTGGAGGGGGTTATATGTTTT

>11

AGATATATTGGAGAAGTTTTGGATGATTTGGGGATTTTGATTATATAGGTTTTAAGTAGGTTTTATTTTATTTTAAATAGTAAGAAATTTTTAATAATTTTATTTAGAAGGTATTGTTTTTATTAGTTTTTTGGAGTTTTTTTTATATCGTATGTTGGGTTAGGTATATGGTCGTTTATTTTTTTTAGTTTTTATAGTATAGAGTAGGGTAGGTTATTTTATTATGTTGTATATAGGAAGTATTGGTATTGTTGGCGTGAGTGGCGTGTGTTCGTTTGTTATTATTTGATTGTCGATTAGGATGATGGGGATAGTAGAGGTTAGGGGTAGGAAGGAAAAGGGTTAGGATAAAAATATAAATGTATTGTGGGATGAGGAAAAGGAATAGAGAATTTGGTTTTATTGGAGATTATAATAGAAGGCGATATAGTTTTGTTTTTGTTTTTTTATTTTGAATGATTTTAGTTTTTTTTTAGTGAAGTTGGTAGATTGAGTTAGGTTTTATAGATTTATTATTCGGGGTTTTTTAAATTTTGTAGGAGAGTAAGGGTTGTTTATAGGTGGTAAGTTAGGATATATTTCGGTGTTGGGGGTTAAGTGGTTTGTTATTTTAAGGGAATAGTGTGGGTTGTAATTTGGGAGTATTAAGTATTTGGTTTGTGTTTATAGTTTTAGTTTAGATGTAGTTTGATTGAAATTTGGTTGTATTAGTGGAGGGGGTTATATGTTTT

>12

AGATATATTGGAGAAGTTTTGGATGATTTGGGGATTTTGATTATATAGGTTTTAAGTAGGTTTTATTTTATTTTAAATAGTAAGAAATTTTTAATAATTTTATTTAGAAGGTATTGTTTTTATTAGTTTTTTGGAGTTTTTTTTATATCGTACGTTGGGTTAGGTATATGGTCGTTTATTTTTTTTAGTTTTTATAGTATAGAGTAGGGTAGGTTATTTTATTATGTTGTATATAGGAAGTATTGGTATTGTTGGCGTGAGTGGCGTGTGTTCGTTTGTTATTATTTGATTGTCGATTAGGATGATGGGGATAGTAGAGGTTAGGGGTAGGAAGGAAAAGGGTTAGGATAAAAATATAAATGTATTGTGGGATGAGGAAAAGGAATAGAGAATTTGGTTTTATTGGAGATTATAATAGAAGGCGATATAGTTTTGTTTTTGTTTTTTTATTTTGAATGATTTTAGTTTTTTTTTAGTGAAGTTGGTAGATTGAGTTAGGTTTTATAGATTTATTATTCGGGGTTTTTTAAATTTTGTAGGAGAGTAAGGGTTGTTTATAGGTGGTAAGTTAGGATATATTTCGGTGTTGGGGGTTAAGTGGTTTGTTATTTTAAGGGAATAGTGTGGGTTGTAATTTGGGAGTATTAAGTATTTGGTTTGTGTTTATAGTTTTAGTTTAGATGTAGTTTGATTGAAATTCGGTTGTATTAGTGGAGGGGGTTATATGTTTT

>13

AGATATATTGGAGAAGTTTTGGATGATTTGGGGATTTTGATTATATAGGTTTTAAGTAGGTTTTATTTTATTTTAAATAGTAAGAAATTTTTAATAATTTTATTTAGAAGGTATTGTTTTTATTAGTTTTTTGGAGTTTTTTTTATATCGTACGTTGGGTTAGGTATATGGTCGTTTATTTTTTTTAGTTTTTATAGTATAGAGTAGGGTAGGTTATTTTATTATGTTGTATATAGGAAGTATTGGTATTGTTGGCGTGAGTGGCGTGTGTTCGTTTGTTATTATTTGATTGTCGATTAGGATGATGGGGATAGTAGAGGTTAGGGGTAGGAAGGAAAAGGGTTAGGATAAAAATATAAATGTATTGTGGGATGAGGAAAAGGAATAGAGAATTTGGTTTTATTGGAGATTATAATAGAAGGCGATATAGTTTTGTTTTTGTTTTTTTATTTTGAATGATTTTAGTTTTTTTTTAGTGAAGTTGGTAGATTGAGTTAGGTTTTATAGATTTATTATTTGGGGTTTTTTAAATTTTGTAGGAGAGTAAGGGTTGTTTATAGGTGGTAAGTTAGGATATATTTCGGTGTTGGGGGTTAAGTGGTTTGTTATTTTAAGGGAATAGTGTGGGTTGTAATTTGGGAGTATTAAGTATTTGGTTTGTGTTTATAGTTTTAGTTTAGATGTAGTTTGATTGAAATTCGGTTGTATTAGTGGAGGGGGTTATATGTTTT

>14

AGATATATTGGAGAAGTTTTGGATGATTTGGGGATTTTGATTATATAGGTTTTAAGTAGGTTTTATTTTATTTTAAATAGTAAGAAATTTTTAATAATTTTATTTAGAAGGTATTGTTTTTATTAGTTTTTTGGAGTTTTTTTTATATTGTATGTTGGGTTAGGTATATGGTTGTTTATTTTTTTTAGTTTTTATAGTATAGAGTAGGGTAGGTTATTTTATTATGTTGTATATAGGAAGTATTGGTATTGTTGGTGTGAGTGGTGTGTGTTTGTTTGTTATTATTTGATTGTTGATTAGGATGATGGGGATAGTAGAGGTTAGGGGTAGGAAGGAAAAGGGTTAGGATAAAAATATAAATGTATTGTGGGATGAGGAAAAGGAATAGAGAATTTGGTTTTATTGGAGATTATAATAGAAGGTGATATAGTTTTGTTTTTGTTTTTTTATTTTGAATGATTTTAGTTTTTTTTTAGTGAAGTTGGTAGATTGAGTTAGGTTTTATAGATTTATTATTTGGGGTTTTTTAAATTTTGTAGGAGAGTAAGGGTTGTTTATAGGTGGTAAGTTAGGATATATTTTGGTGTTGGGGGTTAAGTGGTTTGTTATTTTAAGGGAATAGTGTGGGTTGTAATTTGGGAGTATTAAGTATTTGGTTTGTGTTTATAGTTTTAGTTTAGATGTAGTTTGATTGAAATTTGGTTGTATTAGTGGAGGGGGTTATATGTTTT

>15

AGATATATTGGAGAAGTTTTGGATGATTTGGGGATTTTGATTATATAGGTTTTAAGTAGGTTTTATTTTATTTTAAATAGTAAGAAATTTTTAATAATTTTATTTAGAAGGTATTGTTTTTATTAGTTTTTTGGAGTTTTTTTTATATTGTATGTTGGGTTAGGTATATGGTTGTTTATTTTTTTTAGTTTTTATAGTATAGAGTAGGGTAGGTTATTTTATTATGTTGTATATAGGAAGTATTGGTATTGTTGGTGTGAGTGGTGTGTGTTTGTTTGTTATTATTTGATTGTTGATTAGGATGATGGGGATAGTAGAGGTTAGGGGTAGGAAGGAAAAGGGTTAGGATAAAAATATAAATGTATTGTGGGATGAGGAAAAGGAATAGAGAATTTGGTTTTATTGGAGATTATAATAGAAGGTGATATAGTTTTGTTTTTGTTTTTTTATTTTGAATGATTTTAGTTTTTTTTTAGTGAAGTTGGTAGATTGAGTTAGGTTTTATAGATTTATTATTTGGGGTTTTTTAAATTTTGTAGGAGAGTAAGGGTTGTTTATAGGTGGTAAGTTAGGATATATTTTGGTGTTGGGGGTTAAGTGGTTTGTTATTTTAAGGGAATAGTGTGGGTTGTAATTTGGGAGTATTAAGTATTTGGTTTGTGTTTATAGTTTTAGTTTAGATGTAGTTTGATTGAAATTTGGTTGTATTAGTGGAGGGGGTTATATGTTTT

>16

AGATATATTGGAGAAGTTTTGGATGATTTGGGGATTTTGATTATATAGGTTTTAAGTAGGTTTTATTTTATTTTAAATAGTAAGAAATTTTTAATAATTTTATTTAGAAGGTATTGTTTTTATTAGTTTTTTGGAGTTTTTTTTATATCGTACGTTGGGTTAGGTATATGGTTGTTTATTTTTTTTAGTTTTTATAGTATAGAGTAGGGTAGGTTATTTTATTATGTTGTATATAGGAAGTATTGGTATTGTTGGCGTGAGTGGCGTGTGTTCGTTTGTTATTATTTGATTGTCGATTAGGATGATGGGGATAGTAGAGGTTAGGGGTAGGAAGGAAAAGGGTTAGGATAAAAATATAAATGTATTGTGGGATGAGGAAAAGGAATAGAGAATTTGGTTTTATTGGAGATTATAATAGAAGGTGATATAGTTTTGTTTTTGTTTTTTTATTTTGAATGATTTTAGTTTTTTTTTAGTGAAGTTGGTAGATTGAGTTAGGTTTTATAGATTTATTATTCGGGGTTTTTTAAATTTTGTAGGAGAGTAAGGGTTGTTTATAGGTGGTAAGTTAGGATATATTTCGGTGTTGGGGGTTAAGTGGTTTGTTATTTTAAGGGAATAGTGTGGGTTGTAATTTGGGAGTATTAAGTATTTGGTTTGTGTTTATAGTTTTAGTTTAGATGTAGTTTGATTGAAATTCGGTTGTATTAGTGGAGGGGGTTATATGTTTT

>17

AGATATATTGGAGAAGTTTTGGATGATTTGGGGATTTTGATTATATAGGTTTTAAGTAGGTTTTATTTTATTTTAAATAGTAAGAAATTTTTAATAATTTTATTTAGAAGGTATTGTTTTTATTAGTTTTTTGGAGTTTTTTTTATATTGTATGTTGGGTTAGGTATATGGTCGTTTATTTTTTTTAGTTTTTATAGCATAGAGTAGGGTAGGTTATTTTATTATGTTGTATATAGGAAGTATTGGTATTGTTGGTGTGAGTGGTGTGTGTTTGTTTGTTATTATTTGATTGTTGATTAGGATGATGGGGATAGTAGAGGTTAGGGGTAGGAAGGAAAAGGGTTAGGATAAAAATATAAATGTATTGTGGGATGAGGAAAAGGAATAGAGAATTTGGTTTTATTGGAGATTATAATAGAAGGTGATATAGTTTTGTTTTTGTTTTTTTATTTTGAATGATTTTAGTTTTTTTTTAGTGAAGTTGGTAGATTGAGTTAGGTTTTATAGATTTATTATTTGGGGTTTTTTAAATTTTGTAGGAGAGTAAGGGTTGTTTATAGGTGGTAAGTTAGGATATATTTTGGTGTTGGGGGTTAAGTGGTTTGTTATTTTAAGGGAATAGTGTGGGTTGTAATTTGGGAGTATTAAGTATTTGGTTTGTGTTTATAGTTTTAGTTTAGATGTAGTTTGATTGAAATTTGGTTGTATTAGTGGAGGGGGTTATATGTTTT

>18

AGATATATTGGAGAAGTTTTGGATGATTTGGGGATTTTGATTATATAGGTTTTAAGTAGGTTTTATTTTATTTTAAATAGTAAGAAATTTTTAATAATTTTATTTAGAAGGTATTGTTTTTATTAGTTTTTTGGAGTTTTTCTTATATCGTACGTTGGGTTAGGTATATGGTCGTTTATTTTTTTTAGTTTTTATAGTATAGAGTAGGGTAGGTTATTTTATTATGTTGTATATAGGAAGTATTGGTATTGTTGGCGTGAGTGGCGTGTGTTCGTTTGTTATTATTTGATTGTCGATTAGGATGATGGGGATAGTAGAGGTTAGGGGTAGGAAGGAAAAGGGTTAGGATAAAAATATAAATGTATTGTGGGATGAGGAAAAGGAATAGAGAATTTGGTTTTATTGGAGATTATAATAGAAGGCGATATAGTTTTGTTTTTGTTTTTTTATTTTGAATGATTTTAGTTTTTTTTTAGTGAAGTTGGTAGATTGAGTTAGGTTTTATAGATTTATTATTCGGGGTTTTTTAAATTTTGTAGGAGAGTAAGGGTTGTTTATAGATGGTAAGTTAGGATATATTTCGGTGTTGGGGGTTAAGTGGTTTGTTATTTTAAGGGAATAGTGTGGGTTGTAATTTGGGAGTATTAAGTATTTGGTTTGTGTTTATAGTTTTAGTTTAGATGTAGTTTGATTGAAATTTGGCTGTATTAGTGGAGGGGGTTATATGTTTT

APOBEC(5mC) sequences

>01

AGATATATTGGAGAAGTTTTGGATGATTTGGGGATTTTGATTATATAGGTTTTAAGTAGGTTTTATTTTATTTTAAATAGTAAGAAATTTTTAATAATTTTATTTAGAAGGTATTGTTTTTATTAGTTTTTTGGAGTTTTTTTTATATTGTATGTTGGGTTAGGTATATGGTTGTTTATTTTTTTTAGTTTTTATAGTATAGAGTAGGGTAGGTTATTTTATTATGTTGTATATAGGAAGTATTGGTATTGTTGGCGTGAGTGGCGTGTGTTCGTTTGTTATTATTTGATTGTTGATTAGGATGATGGGGATAGTAGAGGTTAGGGGTAGGAAGGAAAAGGGTTAGGATAAAAATATAAATGTATTGTGGGATGAGGAAAAGGAATAGAGAATTTGGTTTTATTGGAGATTATAATAGAAGGCGATATAGTTTTGTTTTTGTTTTTTTATTTTGAATGATTTTAGTTTTTTTTTAGTGAAGTTGGTAGATTGAGTTAGGTTTTATAGATTTATTATTCGGGGTTTTTTAAATTTTGTAGGAGAGTAAGGGTTGTTTATAGGTGGTAAGTTAGGATATATTTCGGTGTTGGGGGTTAAGTGGTTTGTTATTTTAAGGGAATAGTGTGGGTTGTAATTTGGGAGTATTAAGTATTTGGTTTGTGTTTATAGTTTTAGTTTAGATGTAGTTTGATTGAAATTCGGTTGTATTAGTGGAGGGGGTTATATGTTTT

>02

AGATATATTGGAGAAGTTTTGGATGATTTGGGGATTTTGATTATATAGGTTTTAAGTAGGTTTTATTTTATTTTAAATAGTAAGAAATTTTTAATAATTTTATTTAGAAGGTATTGTTTTTATTAGTTTTTTGGAGTTTTTTTTATATCGTACGTTGGGTTAGGTATATGGTCGTTTATTTTTTTTAGTTTTTATAGTATAGAGTAGGGTAGGTTATTTTATTATGTTGTATATAGGAAGTATTGGTATTGTTGGCGTGAGTGGTGTGTGTTTGTTTGTTATTATTTGATTGTTGATTAGGATGATGGGGATAGTAGAGGTTAGGGGTAGGAAGGAAAAGGGTTAGGATAAAAATATAAATGTATTGTGGGATGAGGAAAAGGAATAGAGAATTTGGTTTTATTGGAGATTATAATAGAAGGTGATATAGTTTTGTTTTTGTTTTTTTATTTTGAATGATTTTAGtTTTTTTTTAGTGAAGTTGGTAGATTGAGTTAGGTTTTATAGATTTATTATTTGGGGTTTTTTAAATTTTGTAGGAGAGTAAGGGTTGTTTATAGGTGGTAAGTTAGGATATATTTTGGTGTTGGGGGTTAAGTGGTTTGTTATTTTAAGGGAATAGTGTGGGTTGTAATTTGGGAGTATTAAGTATTTGGTTTGTGTTTATAGTTTTAGTTTAGATGTAGTTTGATTGAAATTTGGTTGTATTAGTGGAGGGGGTTATATGTTTT

>03

AGATATATTGGAGAAGTTTTGGATGATTTGGGGATTTTGATTATATAGGTTTTAAGTAGGTTTTATTTTATTTTAAATAGTAAGAAATTTTTAATAATTTTATTTAGAAGGTATTGTTTTTATTAGTTTTTTGGAGTTTTTTTTATATTGTATGTTGGGTTAGGTATATGGTTGTTTATTTTTTTTAGTTTTTATAGTATAGAGTAGGGTAGGTTATTTTATTATGTTGTATATAGGAAGTATTGGTATTGTTGGTGTGAGTGGTGTGTGTTTGTTTGTTATTATTTGATTGTTGATTAGGATGATGGGGATAGTAGAGGTTAGGGGTAGGAAGGAAAAGGGTTAGGATAAAAATATAAATGTATTGTGGGATGAGGAAAAGGAATAGAGAATTTGGTTTTATTGGAGATTATAATAGAAGGTGATATAGTTTTGTTTTTGTTTTTTTATTTTGAATGATTTTAGTTTTTTTTTAGTGAAGTTGGTAGATTGAGTTAGGTTTTATAGATTTATTATTTGGGGTTTTTTAAATTTTGTAGGAGAGTAAGGGTTGTTTATAGGTGGTAAGTTAGGATATATTTTGGTGTTGGGGGTTAAGTGGTTTGTTATTTTAAGGGAATAGTGTGGGTTGTAATTTGGGAGTATTAAGTATTTGGTTTGTGTTTATAGTTTTAGTTTAGATGTAGTTTGATTGAAATTTGGTTGTATTAGTGGAGGGGGTTATATGTTTT

>04

AGATATATTGGAGAAGTTTTGGATGATTTGGGGATTTTGATTATATAGGTTTTAAGTAGGTTTTATTTTATTTTAAATAGTAAGAAATTCTTAATAATTTTATTTAGAAGGTATTGTTTTTATTAGTTTTTTGGAGTTTTTTTTATATCGTACGTTGGGTTAGGTATATGGTCGTTTATTTTTTTTAGTTTTTATAGTATAGAGTAGGGTAGGTTATTTTATTATGTTGTATATAGGAAGTATTGGTATTGTTGGCGTGAGTGGCGTGTGTTTGTTTGTTATTATTTGATTGTCGATTAGGATGATGGGGATAGTAGAGGTTAGGGGTAGGAAGGAAAAGGGTTAGGATAAAAATATAAATGTATTGTGGGATGAGGAAAAGGAATAGAGAATTTGGTTTTATTGGAGATTATAATAGAAGGCGATATAGTTTTGTTTTTGTTTTTTTATTTTGAATGATTTTAGTTTTTTTTTAGTGAAGTTGGTAGATTGAGTTAGGTTTTATAGATTTATTATTCGGGGTTTTTTAAATTTTGTAGGAGAGTAAGGGTTGTTTATAGGTGGTAAGTTAGGATATATTTCGGTGTTGGGGGTTAAGTGGTTTGTTATTTTAAGGGAATAGTGTGGGTTGTAATTTGGGAGTATTAAGTATTTGGTTTGTGTTTATAGTTTTAGTTTAGATGTAGTTTGATTGAAATTCGGTTGTATTAGTGGAGGGGGTTATATGTTTT

>05

AGATATATTGGAGAAGTTTTGGATGATTTGGGGATTTTGATTATATAGGTTTTAAGTAGGTTTTATTTTATTTTAAATAGTAAGAAATTTTTAATAATTTTATTTAGAAGGTATTGTTTTTATTAGTTTTTTGGAGTTTTTTTTATATTGTATGTTGGGTTAGGTATATGGTTGTTTATTTTTTTTAGTTTTTATAGTATAGAGTAGGGTAGGTTATTTTATTATGTTGTATATAGGAAGTATTGGTATTGTTGGTGTGAGTGGTGTGTGTTTGTTTGTTATTATTTGATTGTTGATTAGGATGATGGGGATAGTAGAGGTTAGGGGTAGGAAGGAAAAGGGTTAGGATAAAAATATAAATGTATTGTGGGATGAGGAAAAGGAATAGAGAATTTGGTTTTATTGGAGATTATAATAGAAGGTGATATAGTTTTGTTTTTGTTTTTTTATTTTGAATGATTTTAGTTTTTTTTTAGTGAAGTTGGTAGATTGAGTTAGGTTTTATAGATTTATTATTTGGGGTTTTTTAAATTTTGTAGGAGAGTAAGGGTTGTTTATAGGTGGTAAGTTAGGATATATTTTGGTGTTGGGGGTTAAGTGGTTTGTTATTTTAAGGGAATAGTGTGGGTTGTAATTTGGGAGTATTAAGTATTTGGTTTGTGTTTATAGTTTTAGTTTAGATGTAGTTTGATTGAAATTTGGTTGTATTAGTGGAGGGGGTTATATGTTTT

>06

AGATATATTGGAGAAGTTTTGGATGATTTGGGGATTTTGATTATATAGGTTTTAAGTAGGTTTTATTTTATTTTAAATAGTAAGAAATTTTTAATAATTTTATTTAGAAGGTATTGTTTTTATTAGTTTTTTGGAGTTTTTTTTATATTGTATGTTGGGTTAGGTATATGGTTGTTTATTTTTTTTAGTTTTTATAGTATAGAGTAGGGTAGGTTATTTTATTATGTTGTATATAGGAAGTATTGGTATTGTTGGTGTGAGTGGTGTGTGTTTGTTTGTTATTATTTGATTGTTGATTAGGATGATGGGGATAGTAGAGGTTAGGGGTAGGAAGGAAAAGGGTTAGGATAAAAATATAAATGTATTGTGGGATGAGGAAAAGGAATAGAGAATTTGGTTTTATTGGAGATTATAATAGAAGGTGATATAGTTTTGTTTTTGTTTTTTTATTTTGAATGATTTTAGTTTTTTTTTAGTGAAGTTGGTAGATTGAGTTAGGTTTTATAGATTTATTATTTGGGGTTTTTTAAATTTTGTAGGAGAGTAAGGGTTGTTTATAGGTGGTAAGTTAGGATATATTTTGGTGTTGGGGGTTAAGTGGTTTGTTATTTTAAGGGAATAGTGTGGGTTGTAATTTGGGAGTATTAAGTATTTGGTTTGTGTTTATAGTTTTAGTTTAGATGTAGTTTGATTGAAATTTGGTTGTATTAGTGGAGGGGGTTATATGTTTT

>07

AGATATATTGGAGAAGTTTTGGATGATTTGGGGATTTTGATTATATAGGTTTTAAGTAGGTTTTATTTTATTTTAAATAGTAAGAAATTTTTAATAATTTTATTTAGAAGGTATTGTTTTTATTAGTTTTTTGGAGTTTTTTTTATATCGTATGTTGGGTTAGGTATATGGTTGTTTATTTTTTTTAGTTTTTATAGTATAGAGTAGGGTAGGTTATTTTATTATGTTGTATATAGGAAGTATTGGTATTGTTGGTGTGAGTGGTGTGTGTTTGTTTGTTATTATTTGATTGTTGATTAGGATGATGGGGATAGTAGAGGTTAGGGGTAGGAAGGAAAAGGGTTAGGATAAAAATATAAATGTATTGTGGGATGAGGAAAAGGAATAGAGAATTTGGTTTTATTGGAGATTATAATAGAAGGTGATATAGTTTTGTTTTTGTTTTTTTATTTTGAATGATTTTAGTTTTTTTTTAGTGAAGTTGGTAGATTGAGTTAGGTTTTATAGATTTATTATTTGGGGTTTTTTAAATTTTGTAGGAGAGTAAGGGTTGTTTATAGGTGGTAAGTTAGGATATATTTTGGTGTTGGGGGTTAAGTGGTTTGTTATTTTAAGGGAATAGTGTGGGTTGTAATTTGGGAGTATTAAGTATTTGGTTTGTGTTTATAGTTTTAGTTTAGATGTAGTTTGATTGAAATTTGGTTGTATTAGTGGAGGGGGTTATATGTTTT

>08

AGATATATTGGAGAAGTTTTGGATGATTTGGGGATTTTGATTATATAGGTTTTAAGTAGGTTTTATTTTATTTTAAATAGTAAGAAATTTTTAATAATTTTATTTAGAAGGTATTGTTTTTATTAGTTTTTTGGAGTTTTTTTTATATTGTATGTTGGGTTAGGTATATGGTTGTTTATTTTTTTTAGTTTTTATAGTATAGAGTAGGGTAGGTTATTTTATTATGTTGTATATAGGAAGTATTGGTATTGTTGGTGTGAGTGGTGTGTGTTTGTTTGTTATTATTTGATTGTTGATTAGGATGATGGGGATAGTAGAGGTTAGGGGTAGGAAGGAAAAGGGTTAGGATAAAAATATAAATGTATTGTGGGATGAGGAAAAGGAATAGAGAATTTGGTTTTATTGGAGATTATAATAGAAGGTGATATAGTTTTGTTTTTGTTTTTTTATTTTGAATGATTTTAGTTTTTTTTTAGTGAAGTTGGTAGATTGAGTTAGGTTTTATAGATTTATTATTTGGGGTTTTTTAAATTTTGTAGGAGAGTAAGGGTTGTTTATAGGTGGTAAGTTAGGATATATTTTGGTGTTGGGGGTTAAGTGGTTTGTTATTTTAAGGGAATAGTGTGGGTTGTAATTTGGGAGTATTAAGTATTTGGTTTGTGTTTATAGTTTTAGTTTAGATGTAGTTTGATTGAAATTTGGTTGTATTAGTGGAGGGGGTTATATGTTTT

>09

AGATATATTGGAGAAGTTTTGGATGATTTGGGGATTTTGATTATATAGGTTTTAAGTAGGTTTTATTTTATTTTAAATAGTAAGAAATTTTTAATAATTTTATTTAGAAGGTATTGTTTTTATTAGTTTTTTGGAGTTTTTTTTATATCGTACGTTGGGTTAGGTATATGGTCGTTTATTTTTTTTAGTTTTTATAGTATAGAGTAGGGTAGGTTATTTTATTATGTTGTATATAGGAAGTATTGGTATTGTTGGCGTGAGTGGCGTGTGTTCGTTTGTTATTATTTGATTGTCGATTAGGATGATGGGGATAGTAGAGGTTAGGGGTAGGAAGGAAAAGGGTTAGGATAAAAATATAAATGTATTGTGGGATGAGGAAAAGGAATAGAGAATTTGGTTTTATTGGAGATTATAATAGAAGGCGATATAGTTTTGTTTTTGTTTTTTTATTTTGAATGATTTTAGTTTTTTTTTAGTGAAGTTGGTAGATTGAGTTAGGTTTTATAGATTTATTATTCGGGGTTTTTTAAATTTTGTAGGAGAGTAAGGGTTGTTTATAGGTGGTAAGTTAGGATATATTTCGGTGTTGGGGGTTAAGTGGTTTGTTATTTTAAGGGAATAGTGTGGGTTGTAATTTGGGAGTATTAAGTATTTGGTTTGTGTTTATAGTTTTAGTTTAGATGTAGTTTGATTGAAATTCGGTTGTATTAGTGGAGGGGGTTATATGTTTT

>10

AGATATATTGGAGAAGTTTTGGATGATTTGGGGATTTTGATTATATAGGTTTTAAGTAGGTTTTATTTTATTTTAAATAGTAAGAAATTTTTAATAATTTTATTTAGAAGGTATTGTTTTTATTAGTTTTTTGGAGTTTTTTTTATATTGTATGTTGGGTTAGGTATATGGTTGTTTATTTTTTTTAGTTTTTATAGTATAGAGTAGGGTAGGTTATTTTATTATGTTGTATATAGGAAGTATTGGTATTGTTGGTGTGAGTGGTGTGTGTTCGTTTGTTATTATTTGATTGTTGATTAGGATGATGGGGATAGTAGAGGTTAGGGGTAGGAAGGAAAAGGGTTAGGATAAAAATATAAATGTATTGTGGGATGAGGAAAAGGAATAGAGAATTTGGTTTTATTGGAGATTATAATAGAAGGCGATATAGTTTTGTTTTTGTTTTTTTATTTTGAATGATTTTAGTTTTTTTTTAGTGAAGTTGGTAGATTGAGTTAGGTTTTATAGATTTATTATTTGGGGTTTTTTAAATTTTGTAGGAGAGTAAGGGTTGTTTATAGGTGGTAAGTTAGGATATATTTCGGTGTTGGGGGTTAAGTGGTTTGTTATTTTAAGGGAATAGTGTGGGTTGTAATTTGGGAGTATTAAGTATTTGGTTTGTGTTTATAGTTTTAGTTTAGATGTAGTTTGATTGAAATTTGGTTGTATTAGTGGAGGGGGTTATATGTTTT

>11

AGATATATTGGAGAAGTTTTGGATGATTTGGGGATTTTGATTATATAGGTTTTAAGTAGGTTTTATTTTATTTTAAATAGTAAGAAATTTTTAATAATTTTATTTAGAAGGTATTGTTTTTATTAGTTTTTTGGAGTTTTTTTTATATCGTACGTTGGGTTAGGTATATGGTCGTTTATTTTTTTTAGTTTTTATAGTATAGAGTAGGGTAGGTTATTTTATTATGTTGTATATAGGAAGTATTGGTATTGTTGGCGTGAGTGGCGTGTGTTCGTTTGTTATTATTTGATTGTCGATTAGGATGATGGGGATAGTAGAGGTTAGGGGTAGGAAGGAAAAGGGTTAGGATAAAAATATAAATGTATTGTGGGATGAGGAAAAGGAATAGAGAATTTGGTTTTATTGGAGATTATAATAGAAGGCGATATAGTTTTGTTTTTGTTTTTTTATTTTGAATGATTTTAGTTTTTTTTTAGTGAAGTTGGTAGATTGAGTTAGGTTTTATAGATTTATTATTCGGGGTTTTTTAAATTTTGTAGGAGAGTAAGGGTTGTTTATAGGTGGTAAGTTAGGATATATTTCGGTGTTGGGGGTTAAGTGGTTTGTTATTTTAAGGGAATAGTGTGGGTTGTAATTTGGGAGTATTAAGTATTTGGTTTGTGTTTATAGTTTTAGTTTAGATGTAGTTTGATTGAAATTCGGTCGTATTAGTGGAGGGGGTTATATGTTTT

>12

AGATATATTGGAGAAGTTTTGGATGATTTGGGGATTTTGATTATATAGGTTTTAAGTAGGTTTTATTTTATTTTAAATAGTAAGAAATTTTTAATAATTTTATTTAGAAGGTATTGTTTTTATTAGTTTTTTGGAGTTTTTTTTATATCGTACGTTGGGTTAGGTATATGGTCGTTTATTTTTTTTAGTTTTTATAGTATAGAGTAGGGTAGGTTATTTTATTATGTTGTATATAGGAAGTATTGGTATTGTTGGTGTGAGTGGTGTGTGTTCGTTTGTTATTATTTGATTGTCGATTAGGATGATGGGGATAGTAGAGGTTAGGGGTAGGAAGGAAAAGGGTTAGGATAAAAATATAAATGTATTGTGGGATGAGGAAAAGGAATAGAGAATTTGGTTTTATTGGAGATTATAATAGAAGGCGATATAGTTTTGTTTTTGTTTTTTTATTTTGAATGATTTTAGTTTTTTTTTAGTGAAGTTGGTAGATTGAGTTAGGTTTTATAGATTTATTATTTGGGGTTTTTTAAATTTTGTAGGAGAGTAAGGGTTGTTTATAGGTGGTAAGTTAGGATATATTTCGGTGTTGGGGGTTAAGTGGTTTGTTATTTTAAGGGAATAGTGTGGGTTGTAATTTGGGAGTATTAAGTATTTGGTTTGTGTTTATAGTTTTAGTTTAGATGTAGTTTGATTGAAATTCGGTTGTATTAGTGGAGGGGGTTATATGTTTT

>13

AGATATATTGGAGAAGTTTTGGATGATTTGGGGATTTTGATTATATAGGTTTTAAGTAGGTTTTATTTTATTTTAAATAGTAAGAAATTTTTAATAATTTTATTTAGAAGGTATTGTTTTTATTAGTTTTTTGGAGTTTTTTTTATATCGTATGTTGGGTTAGGTATATGGTTGTTTATTTTTTTTAGTTTTTATAGTATAGAGTAGGGTAGGTTATTTTATTATGTTGTATATAGGAAGTATTGGTATTGTTGGTGTGAGTGGCGTGTGTTCGTTTGTTATTATTTGATTGTTGATTAGGATGATGGGGATAGTAGAGGTTAGGGGTAGGAAGGAAAAGGGTTAGGATAAAAATATAAATGTATTGTGGGATGAGGAAAAGGAATAGAGAATTTGGTTTTATTGGAGATTATAATAGAAGGCGATACAGTTTTGTTTTTGTTTTTTTATTTTGAATGATTTTAGTTTTTTTTTAGTGAAGTTGGTAGATTGAGTTAGGTTTTATAGATTTATTATTTGGGGTTTTTTAAATTTTGTAGGAGAGTAAGGGTTGTTTATAGGTGGTAAGTTAGGATATATTTCGGTGTTGGGGGTTAAGTGGTTTGTTATTTTAAGGGAATAGTGTGGGTTGTAATTTGGGAGTATTAAGTATTTGGTTTGTGTTTATAGTTTTAGTTTAGATGTAGTTTGATTGAAATTTGGTTGTATTAGTGGAGGGGGTTATATGTTTT

>14

AGATATATTGGAGAAGTTTTGGATGATTTGGGGATTTTGATTATATAGGTTTTAAGTAGGTTTTATTTTATTTTAAATAGTAAGAAATTTTTAATAATTTTATTTAGAAGGTATTGTTTTTATTAGTTTTTTGGAGTTTTTTTTATATTGTATGTTGGGTTAGGTATATGGTCGTTTATTTTTTTTAGTTTTTATAGTATAGAGTAGGGTAGGTTATTTTATTATGTTGTATATAGGAAGTATTGGTATTGTTGGTGTGAGTGGCGTGTGTTCGTTTGTTATTATTTGATTGTCGATTAGGATGATGGGGATAGTAGAGGTTAGGGGTAGGAAGGAAAAGGGTTAGGATAAAAATATAAATGTATTGTGGGATGAGGAAAAGGAATAGAGAATTTGGTTTTATTGGAGATTATAATAGAAGGCGATATAGTTTTGTTTTTGTTTTTTTATTTTGAATGATTTTAGTTTTTTTTTAGTGAAGTTGGTAGATTGAGTTAGGTTTTATAGATTTATTATTTGGGGTTTTTTAAATTTTGTAGGAGAGTAAGGGTTGTTTATAGGTGGTAAGTTAGGATATATTTCGGTGTTGGGGGTTAAGTGGTTTGTTATTTTAAGGGAATAGTGTGGGTTGTAATTTGGGAGTATTAAGTATTTGGTTTGTGTTTATAGTTTTAGTTTAGATGTAGTTTGATTGAAATTCGGTTGTATTAGTGGAGGGGGTTATATGTTTT

>15

AGATATATTGGAGAAGTTTTGGATGATTTGGGGATTTTGATTATATAGGTTTTAAGTAGGTTTTATTTTATTTTAAATAGTAAGAAATTTTTAATAATTTTATTTAGAAGGTATTGTTTTTATTAGTTTTTTGGAGTTTTTTTTATATCGTATGTTGGGTTAGGTATATGGTCGTTTATTTTTTTTAGTTTTTATAGTATAGAGTAGGGTAGGTTATTTTATTATGTTGTATATAGGAAGTATTGGTATTGTTGGCGTGAGTGGCGTGTGTTCGTTTGTTATTATTTGATTGTCGATTAGGATGATGGGGATAGTAGAGGTTAGGGGTAGGAAGGAAAAGGGTTAGGATAAAAATATAAATGTATTGTGGGATGAGGAAAAGGAATAGAGAATTTGGTTTTATTGGAGATTATAATAGAAGGCGATATAGTTTTGTTTTTGTTTTTTTATTTTGAATGATTTTAGTTTTTTTTTAGTGAAGTTGGTAGATTGAGTTAGGTTTTATAGATTTATTATTCGGGGTTTTTTAAATTTTGTAGGAGAGTAAGGGTTGTTTATAGGTGGTAAGTTAGGATATATTTCGGTGTTGGGGGTTAAGTGGTTTGTTATTTTAAGGGAATAGTGTGGGTTGTAATTTGGGAGTATTAAGTATTTGGTTTGTGTTTATAGTTTCAGTTTAGATGTAGTTTGATTGAAATTCGGTTGTATTAGTGGAGGGGGTTATATGTTTT

>16

AGATATATTGGAGAAGTTTTGGATGATTTGGGGATTTTGATTATATAGGTTTTAAGTAGGTTTTATTTTATTTTAAATAGTAAGAAATTTTTAATAATTTTATTTAGAAGGTATTGTTTTTATTAGTTTTTTGGAGTTTTTTTTATATCGTATGTTGGGTTAGGTATATGGTCGTTTATTTTTTTTAGTTTTTATAGTATAGAGTAGGGTAGGTTATTTTATTATGTTGTATATAGGAAGTATTGGTATTGTTGGCGTGAGTGGCGTGTGTTCGTTTGTTATTATTTGATTGTCGATTAGGATGATGGGGATAGTAGAGGTTAGGGGTAGGAAGGAAAAGGGTTAGGATAAAAATATAAATGTATTGTGGGATGAGGAAAAGGAATAGAGAATTTGGTTTTATTGGAGATTATAATAGAAGGCGATATAGTTTTGTTTTTGTTTTTTTATTTTGAATGATTTTAGTTTTTTTTTAGTGAAGTTGGTAGATTGAGTTAGGTTTTATAGATTTATTATTCGGGGTTTTTTAAATTTTGTAGGAGAGTAAGGGTTGTTTATAGGTGGTAAGTTAGGATATATTTTGGTGTTGGGGGTTAAGTGGTTTGTTATTTTAAGGGAATAGTGTGGGTTGTAATTTGGGAGTATTAAGTATTTGGTTTGTGTTTATAGTTTTAGTTTAGATGTAGTTTGATTGAAATTCGGTTGTATTAGTGGAGGGGGTTATATGTTTT

>17

AGATATATTGGAGAAGTTTTGGATGATTTGGGGATTTTGATTATATAGGTTTTAAGTAGGTTTTATTTTATTTTAAATAGTAAGAAATTTTTAATAATTTTATTTAGAAGGTATTGTTTTTATTAGTTTTTTGGAGTTTTTTTTATATCGTACGTTGGGTTAGGTATATGGTCGTTTATTTTTTTTAGTTTTTATAGTATAGAGTAGGGTAGGTTATTTTATTATGTTGTATATAGGAAGTATTGGTATTGTTGGTGTGAGTGGCGTGTGTTCGTTTGTTATTATTTGATTGTCGATTAGGATGATGGGGATAGTAGAGGTTAGGGGTAGGAAGGAAAAGGGTTAGGATAAAAATATAAATGTATTGTGGGATGAGGAAAAGGAATAGAGAATTTGGTTTTATTGGAGATTATAATAGAAGGCGATATAGTTTTGTTTTTGTTTTTTTATTTTGAATGATTTTAGTTTTTTTTTAGTGAAGTTGGTAGATTGAGTTAGGTTTTATAGATTTATTATTCGGGGTTTTTTAAATTTTGTAGGAGAGTAAGGGTTGTTTATAGGTGGTAAGTTAGGATATATTTCGGTGTTGGGGGTTAAGTGGTTTGTTATTTTAAGGGAATAGTGTGGGTTGTAATTTGGGAGTATTAAGTATTTGGTTTGTGTTTATAGTTTTAGTTTAGATGTAGTTTGATTGAAATTTGGTTGTATTAGTGGAGGGGGTTATATGTTTT

>18

AGATATATTGGAGAAGTTTTGGATGATTTGGGGATTTTGATTATATAGGTTTTAAGTAGGTTTTATTTTATTTTAAATAGTAAGAAATTTTTAATAATTTTATTTAGAAGGTATTGTTTTTATTAGTTTTTTGGAGTTTTTTTTATATCGTACGTTGGGTTAGGTATATGGTCGTTTATTTTTTTTAGTTTTTATAGTATAGAGTAGGGTAGGTTATTTTATTATGTTGTATATAGGAAGTATTGGTATTGTTGGCGTGAGTGGTGTGTGTTCGTTTGTTATTATTTGATTGTCGATTAGGATGATGGGGATAGTAGAGGTTAGGGGTAGGAAGGAAAAGGGTTAGGATAAAAATATAAATGTATTGTGGGATGAGGAAAAGGAATAGAGAATTTGGTTTTATTGGAGATTATAATAGAAGGCGATATAGTTTTGTTTTTGTTTTTTTATTTTGAATGATTTTAGTTTTTTTTTAGTGAAGTTGGTAGATTGAGTTAGGTTTTATAGATTTATTATTCGGGGTTTTTTAAATTTTGTAGGAGAGTAAGGGTTGTTTATAGGTGGTAAGTTAGGATATATTTCGGTGTTGGGGGTTAAGTGGTTTGTTATTTTAAGGGAATAGTGTGGGTTGTAATTTGGGAGTATTAAGTATTTGGTTTGTGTTTATAGTTTTAGTTTAGATGTAGTTTGATTGAAATTCGGTTGTATTAGTGGAGGGGGTTATATGTTTT

>19

AGATATATTGGAGAAGTTTTGGATGATTTGGGGATTTTGATTATATAGGTTTTAAGTAGGTTTTATTTTATTTTAAATAGTAAGAAATTTTTAATAATTTTATTTAGAAGGTATTGTTTTTATTAGTTTTTTGGAGTTTTTTTTATATTGTATGTTGGGTTAGGTATATGGTTGTTTATTTTTTTTAGTTTTTATAGTATAGAGTAGGGTAGGTTATTTTATTATGTTGTATATAGGAAGTATTGGTATTGTTGGTGTGAGTGGTGTGTGTTTGTTTGTTATTATTTGATTGTTGATTAGGATGATGGGGATAGTAGAGGTTAGGGGTAGGAAGGAAAAGGGTTAGGATAAAAATATAAATGTATTGTGGGATGAGGAAAAGGAATAGAGAATTTGGTTTTATTGGAGATTATAATAGAAGGTGATATAGTTTTGTTTTTGTTTTTTTATTTTGAATGATTTTAGTTTTTTTTTAGTGAAGTTGGTAGATTGAGTTAGGTTTTATAGATTTATTATTCGGGGTTTTTTAAATTTTGTAGGAGAGTAAGGGTTGTTTATAGGTGGTAAGTTAGGATATATTTCGGTGTTGGGGGTTAAGTGGTTTGTTATTTTAAGGGAATAGTGTGGGTTGTAATTTGGGAGTATTAAGTATTTGGTTTGTGTTTATAGTTTTAGTTTAGATGTAGTTTGATTGAAATTCGGTTGTATTAGTGGAGGGGGTTATATGTTTTCCTATAA

>20

AGATATATTGGAGAAGTTTTGGATGATTTGGGGATTTTGATTATATAGGTTTTAAGTAGGTTTTATTTTATTTTAAATAGTAAGAAATTTTTAATAATTTTATTTAGAAGGTATTGTTTTTATTAGTTTTTTGGAGTTTTTTTTATATTGTATGTTGGGTTAGGTATATGGTTGTTTATTTTTTTTAGTTTTTATAGTATAGAGTAGGGTAGGTTATTTTATTATGTTGTATATAGGAAGTATTGGTATTGTTGGTGTGAGTGGTGTGTGTTTGTTTGTTATTATTTGATTGTTGATTAGGATGATGGGGATAGTAGAGGTTAGGGGTAGGAAGGAAAAGGGTTAGGATAAAAATATAAATGTATTGTGGGATGAGGAAAAGGAATAGAGAATTTGGTTTTATTGGAGATTATAATAGAAGGTGATATAGTTTTGTTTTTGTTTTTTTATTTTGAATGATTTTAGTTTTTTTTTAGTGAAGTTGGTAGATTGAGTTAGGTTTTATAGATTTATTATTTGGGGTTTTTTAAATTTTGTAGGAGAGTAAGGGTTGTTTATAGGTGGTAAGTTAGGATATATTTTGGTGTTGGGGGTTAAGTGGTTTGTTATTTTAAGGGAATAGTGTGGGTTGTAATTTGGGAGTATTAAGTATTTGGTTTGTGTTTATAGTTTTAGTTTAGATGTAGTTTGATTGAAATTCGGTTGTATTAGTGGAGGGGGTTATATGTTTT

APOBEC(5hmC) sequences

>01

AGATATATTGGAGAAGTTTTGGATGATTTGGGGATTTTGATTATATAGGTTTTAAGTAGGTTTTATTTTATTTTAAATAGTAAGAAATTTTTAATAATTTTATTTAGAAGGTATTGTTTTTATTAGTTTTTTGGAGTTTTTTTTATATCGTATGTTGGGTTAGGTATATGGTCGTTTATTTTTTTTAGTTTTTATAGTATAGAGTAGGGTAGGTTATTTTATTATGTTGTATATAGGAAGTATTGGTATTGTTGGTGTGAGTGGCGTGTGTTTGTTTGTTATTATTTGATTGTCGATTAGGATGATGGGGATAGTAGAGGTTAGGGGTAGGAAGGAAAAGGGTTAGGATAAAAATATAAATGTATTGTGGGATGAGGAAAAGGAATAGAGAATTTGGTTTTATTGGAGATTATAATAGAAGGCGATATAGTTTTGTTTTTGTTTTTTTATTTTGAATGATTTTAGTTTTTTTTTAGTGAAGTTGGTAGATTGAGTTAGGTTTTATAGATTTATTATTTGGGGTTTTTTAAATTTTGTAGGAGAGTAAGGGTTGTTTATAGGTGGTAAGTTAGGATATATTTTGGTGTTGGKGGTTAAGTGGTTTGTTATTTTAAGGGAATAGTGTGGGTTGTAATTTGGGAGTATTAAGTATTTGGTTTGTGTTTATAGTTTTAGTTTAGATGTAGTTTGATTGAAATTCGGTTGTATTAGTGGAGGGGGTTATATGTTTT

>02

AGATATATTGGAGAAGTTTTGGATGATTTGGGGATTTTGATTATATAGGTTTTAAGTAGGTTTTATTTTATTTTAAATAGTAAGAAATTTTTAATAATTTTATTTAGAAGGTATTGTTTTTATTAGTTTTTTGGAGTTTTTTTTATATTGTATGTTGGGTTAGGTATATGGTTGTTTATTTTTTTTAGTTTTTATAGTATAGAGTAGGGTAGGTTATTTTATTATGTTGTATATAGGAAGTATTGGTATTGTTGGTGTGAGTGGTGTGTGTTTGTTTGTTATTATTTGATTGTTGATTAGGATGATGGGGATAGTAGAGGTTAGGGGTAGGAAGGAAAAGGGTTAGGATAAAAATATAAATGTATTGTGGGATGAGGAAAAGGAATAGAGAATTTGGTTTTATTGGAGATTATAATAGAAGGTGATATAGTTTTGTTTTTGTTTTTTTATTTTGAATGATTTTAGTTTTTTTTTAGTGAAGTTGGTAGATTGAGTTAGGTTTTATAGATTTATTATTTGGGGTTTTTTAAATTTTGTAGGAGAGTAAGGGTTGTTTATAGGTGGTAAGTTAGGATATATTTTGGTGTTGGGGGTTAAGTGGTTTGTTATTTTAAGGGAATAGTGTGGGTTGTAATTTGGGAGTATTAAGTATTTGGTTTGTGTTTATAGTTTTAGTTTAGATGTAGTTTGATTGAAATTTGGTTGTATTAGTGGAGGGGGTTATATGTTTT

>03

AGATATATTGGAGAAGTTTTGGATGATTTGGGGATTTTGATTATATAGGTTTTAAGTAGGTTTTATTTTATTTTAAATAGTAAGAAATTTTTAATAATTTTATTTAGAAGGTATTGTTTTTATTAGTTTTTTGGAGTTTTTTTTATATTGTATGTTGGGTTAGGTATATGGTTGTTTATTTTTTTTAGTTTTTATAGTATAGAGTAGGGTAGGTTATTTTATTATGTTGTATATAGGAAGTATTGGTATTGTTGGTGTGAGTGGTGTGTGTTTGTTTGTTATTATTTGATTGTTGATTAGGATGATGGGGATAGTAGAGGTTAGGGGTAGGAAGGAAAAGGGTTAGGATAAAAATATAAATGTATTGTGGGATGAGGAAAAGGAATAGAGAATTTGGTTTTATTGGAGATTATAATAGAAGGTGATATAGTTTTGTTTTTGTTTTTTTATTTTGAATGATTTTAGTTTTTTTTTAGTGAAGTTGGTAGATTGAGTTAGGTTTTATAGATTTATTATTTGGGGTTTTTTAAATTTTGTAGGAGAGTAAGGGTTGTTTATAGGTGGTAAGTTAGGATATATTTTGGTGTTGGGGGTTAAGTGGTTTGTTATTTTAAGGGAATAGTGTGGGTTGTAATTTGGGAGTATTAAGTATTTGGTTTGTGTTTATAGTTTTAGTTTAGATGTAGTTTGATTGAAATTTGGTTGTATTAGTGGAGGGGGTTATATGTTTT

>04

AGATATATTGGAGAAGTTTTGGATGATTTGGGGATTTTGATTATATAGGTTTTAAGTAGGTTTTATTTTATTTTAAATAGTAAGAAATTTTTAATAATTTTATTTAGAAGGTATTGTTTTTATTAGTTTTTTGGAGTTTTTTTTATATTGTATGTTGGGTTAGGTATATGGTTGTTTATTTTTTTTAGTTTTTATAGTATAGAGTAGGGTAGGTTATTTTATTATGTTGTATATAGGAAGTATTGGTATTGTTGGTGTGAGTGGTGTGTGTTTGTTTGTTATTATTTGATTGTTGATTAGGATGATGGGGATAGTAGAGGTTAGGGGTAGGAAGGAAAAGGGTTAGGATAAAAATATAAATGTATTGTGGGATGAGGAAAAGGAATAGAGAATTTGGTTTTATTGGAGATTATAATAGAAGGTGATATAGTTTTGTTTTTGTTTTTTTATTTTGAATGATTTTAGTTTTTTTTTAGTGAAGTTGGTAGATTGAGTTAGGTTTTATAGATTTATTATTTGGGGTTTTTTAAATTTTGTAGGAGAGTAAGGGTTGTTTATAGGTGGTAAGTTAGGATATATTTTGGTGTTGGGGGTTAAGTGGTTTGTTATTTTAAGGGAATAGTGTGGGTTGTAATTTGGGAGTATTAAGTATTTGGTTTGTGTTTATAGTTTTAGTTTAGATGTAGTTTGATTGAAATTTGGTTGTATTAGTGGAGGGGGTTATATGTTTT

>05

AGATATATTGGAGAAGTTTTGGATGATTTGGGGATTTTGATTATATAGGTTTTAAGTAGGTTTTATTTTATTTTAAATAGTAAGAAATTTTTAATAATTTTATTTAGAAGGTATTGTTTTTATTAGTTTTTTGGAGTTTTTTTTATATTGTATGTTGGGTTAGGTATATGGTTGTTTATTTTTTTTAGTTTTTATAGTATAGAGTAGGGTAGGTTATTTTATTATGTTGTATATAGGAAGTATTGGTATTGTTGGCGTGAGTGGTGTGTGTTTGTTTGTTATTATTTGATTGTTGATTAGGATGATGGGGATAGTAGAGGTTAGGGGTAGGAAGGAAAAGGGTTAGGATAAAAATATAAATGTATTGTGGGATGAGGAAAAGGAATAGAGAATTTGGTTTTATTGGAGATTATAATAGAAGGTGATATAGTTTTGTTTTTGTTTTTTTATTTTGAATGATTTTAGTTTTTTTTTAGTGAAGTTGGTAGATTGAGTTAGGTTTTATAGATTTATTATTTGGGGTTTTTTAAATTTTGTAGGAGAGTAAGGGTTGTTTATAGGTGGTAAGTTAGGATATATTTTGGTGTTGGGGGTTAAGTGGTTTGTTATTTTAAGGGAATAGTGTGGGTTGTAATTTGGGAGTATTAAGTATTTGGTTTGTGTTTATAGTTTTAGTTTAGATGTAGTTTGATTGAAATTTGGTTGTATTAGTGGAGGGGGTTATATGTTTT

>06

AGATATATTGGAGAAGTTTTGGATGATTTGGGGATTTTGATTATATAGGTTTTAAGTAGGTTTTATTTTATTTTAAATAGTAAGAAATTTTTAATAATTTTATTTAGAAGGTATTGTTTTTATTAGTTTTTTGGAGTTTTTTTTATATTGTATGTTGGGTTAGGTATATGGTTGTTTATTTTTTTTAGTTTTTATAGTATAGAGTAGGGTAGGTTATTTTATTATGTTGTATATAGGAAGTATTGGTATTGTTGGTGTGAGTGGTGTGTGTTTGTTTGTTATTATTTGATTGTTGATTAGGATGATGGGGATAGTAGAGGTTAGGGGTAGGAAGGAAAAGGGTTAGGATAAAAATATAAATGTATTGTGGGATGAGGAAAAGGAATAGAGAATTTGGTTTTATTGGAGATTATAATAGAAGGTGATATAGTTTTGTTTTTGTTTTTTTATTTTGAATGATTTTAGTTTTTTTTTAGTGAAGTTGGTAGATTGAGTTAGGTTTTATAGATTTATTATTTGGGGTTTTTTAAATTTTGTAGGAGAGTAAGGGTTGTTTATAGGTGGTAAGTTAGGATATATTTTGGTGTTGGGGGTTAAGTGGTTTGTTATTTTAAGGGAATAGTGTGGGTTGTAATTTGGGAGTATTAAGTATTTGGTTTGTGTTTATAGTTTTAGTTTAGATGTAGTTTGATTGAAATTTGGTTGTATTAGTGGAGGGGGTTATATGTTTT

>07

AGATATATTGGAGAAGTTTTGGATGATTTGGGGATTTTGATTATATAGGTTTTAAGTAGGTTTTATTTTATTTTAAATAGTAAGAAATTTTTAATAATTTTATTTAGAAGGTATTGTTTTTATTAGTTTTTTGGAGTTTTTTTTATATTGTATGTTGGGTTAGGTATATGGTCGTTTATTTTTTTTAGTTTTTATAGTATAGAGTAGGGTAGGTTATTTTATTATGTTGTATATAGGAAGTATTGGTATTGTTGGTGTGAGTGGTGTGTGTTTGTTTGTTATTATTTGATTGTTGATTAGGATGATGGGGATAGTAGAGGTTAGGGGTAGGAAGGAAAAGGGTTAGGATAAAAATATAAATGTATTGTGGGATGAGGAAAAGGAATAGAGAATTTGGTTTTATTGGAGATTATAATAGAAGGTGATATAGTTTTGTTTTTGTTTTTTTATTTTGAATGATTTTAGTTTTTTTTTAGTGAAGTTGGTAGATTGAGTTAGGTTTTATAGATTTATTATTTGGGGTTTTTTAAATTTTGTAGGAGAGTAAGGGTTGTTTATAGGTGGTAAGTTAGGATATATTTTGGTGTTGGGGGTTAAGTGGTTTGTTATTTTAAGGGAATAGTGTGGGTTGTAATTTGGGAGTATTAAGTATTTGGTTTGTGTTTATAGTTTTAGTTTAGATGTAGTTTGATTGAAATTTGGTTGTATTAGTGGAGGGGGTTATATGTTTT

>08

AGATATATTGGAGAAGTTTTGGATGATTTGGGGATTTTGATTATATAGGTTTTAAGTAGGTTTTATTTTATTTTAAATAGTAAGAAATTTTTAATAATTTTATTTAGAAGGTATTGTTTTTATTAGTTTTTTGGAGTTTTTTTTATATTGTATGTTGGGTTAGGTATATGGTTGTTTATTTTTTTTAGTTTTTATAGTATAGAGTAGGGTAGGTTATTTTATTATGTTGTATATAGGAAGTATTGGTATTGTTGGTGTGAGTGGTGTGTGTTTGTTTGTTATTATTTGATTGTTGATTAGGATGATGGGGATAGTAGAGGTTAGGGGTAGGAAGGAAAAGGGTTAGGATAAAAATATAAATGTATTGTGGGATGAGGAAAAGGAATAGAGAATTTGGTTTTATTGGAGATTATAATAGAAGGTGATATAGTTTTGTTTTTGTTTTTTTATTTTGAATGATTTTAGTTTTTTTTTAGTGAAGTTGGTAGATTGAGTTAGGTTTTATAGATTTATTATTTGGGGTTTTTTAAATTTTGTAGGAGAGTAAGGGTTGTTTATAGGTGGTAAGTTAGGATATATTTTGGTGTTGGGGGTTAAGTGGTTTGTTATTTTAAGGGAATAGTGTGGGTTGTAATTTGGGAGTATTAAGTATTTGGTTTGTGTTTATAGTTTTAGTTTAGATGTAGTTTGATTGAAATTTGGTTGTATTAGTGGAGGGGGTTATATGTTTT

>09

AGATATATTGGAGAAGTTTTGGATGATTTGGGGATTTTGATTATATAGGTTTTAAGTAGGTTTTATTTTATTTTAAATAGTAAGAAATTTTTAATAATTTTATTTAGAAGGTATTGTTTTTATTAGTTTTTTGGAGTTTTTTTTATATTGTATGTTGGGTTAGGTATATGGTTGTTTATTTTTTTTAGTTTTTATAGTATAGAGTAGGGTAGGTTATTTTATTATGTTGTATATAGGAAGTATTGGTATTGTTGGTGTGAGTGGTGTGTGTTTGTTTGTTATTATTTGATTGTTGATTAGGATGATGGGGATAGTAGAGGTTAGGGGTAGGAAGGAAAAGGGTTAGGATAAAAATATAAATGTATTGTGGGATGAGGAAAAGGAATAGAGAATTTGGTTTTATTGGAGATTATAATAGAAGGTGATATAGTTTTGTTTTTGTTTTTTTATTTTGAATGATTTTAGTTTTTTTTTAGTGAAGTTGGTAGATTGAGTTAGGTTTTATAGATTTATTATTTGGGGTTTTTTAAATTTTGTAGGAGAGTAAGGGTTGTTTATAGGTGGTAAGTTAGGATATATTTTGGTGTTGGGGGTTAAGTGGTTTGTTATTTTAAGGGAATAGTGTGGGTTGTAATTTGGGAGTATTAAGTATTTGGTTTGTGTTTATAGTTTTAGTTTAGATGTAGTTTGATTGAAATTTGGTTGTATTAGTGGAGGGGGTTATATGTTTT

>10

AGATATATTGGAGAAGTTTTGGATGATTTGGGGATTTTGATTATATAGGTTTTAAGTAGGTTTTATTTTATTTTAAATAGTAAGAAATTTTTAATAATTTTATTTAGAAGGTATTGTTTTTATTAGTTTTTTGGAGTTTTTTTTATATCGTATGTTGGGTTAGGTATATGGTTGTTTATTTTTTTTAGTTTTTATAGTATAGAGTAGGGTAGGTTATTTTATTATGTTGTATATAGGAAGTATTGGTATTGTTGGTGTGAGTGGTGTGTGTTTGTTTGTTATTATTTGATTGTTGATTAGGATGATGGGGATAGTAGAGGTTAGGGGTAGGAAGGAAAAGGGTTAGGATAAAAATATAAATGTATTGTGGGATGAGGAAAAGGAATAGAGAATTTGGTTTTATTGGAGATTATAATAGAAGGTGATATAGTTTTGTTTTTGTTTTTTTATTTTGAATGATTTTAGTTTTTTTTTAGTGAAGTTGGTAGATTGAGTTAGGTTTTATAGATTTATTATTTGGGGTTTTTTAAATTTTGTAGGAGAGTAAGGGTTGTTTATAGGTGGTAAGTTAGGATATATTTTGGTGTTGGGGGTTAAGTGGTTTGTTATTTTAAGGGAATAGTGTGGGTTGTAATTTGGGAGTATTAAGTATTTGGTTTGTGTTTATAGTTTTAGTTTAGATGTAGTTTGATTGAAATTTGGTTGTATTAGTGGAGGGGGTTATATGTTTT

>11

AGATATATTGGAGAAGTTTTGGATGATTTGGGGATTTTGATTATATAGGTTTTAAGTAGGTTTTATTTTATTTTAAATAGTAAGAAATTTTTAATAATTTTATTTAGAAGGTATTGTTTTTATTAGTTTTTTGGAGTTTTTTTTATATCGTACGTTGGGTTAGGTATATGGTTGTTTATTTTTTTTAGTTTTTATAGTATAGAGTAGGGTAGGTTATTTTATTATGTTGTATATAGGAAGTATTGGTATTGTTGGTGTGAGTGGTGTGTGTTTGTTTGTTATTATTTGATTGTTGATTAGGATGATGGGGATAGTAGAGGTTAGGGGTAGGAAGGAAAAGGGTTAGGATAAAAATATAAATGTATTGTGGGATGAGGAAAAGGAATAGAGAATTTGGTTTTATTGGAGATTATAATAGAAGGTGATATAGTTTTGTTTTTGTTTTTTTATTTTGAATGATTTTAGTTTTTTTTTAGTGAAGTTGGTAGATTGAGTTAGGTTTTATAGATTTATTATTTGGGGTTTTTTAAATTTTGTAGGAGAGTAAGGGTTGTTTATAGGTGGTAAGTTAGGATATATTTTGGTGTTGGGGGTTAAGTGGTTTGTTATTTTAAGGGAATAGTGTGGGTTGTAATTTGGGAGTATTAAGTATTTGGTTTGTGTTTATAGTTTTAGTTTAGATGTAGTTTGATTGAAATTTGGTTGTATTAGTGGAGGGGGTTATATGTTTT

>12

AGATATATTGGAGAAGTTTTGGATGATTTGGGGATTTTGATTATATAGGTTTTAAGTAGGTTTTATTTTATTTTAAATAGTAAGAAATTTTTAATAATTTTATTTAGAAGGTATTGTTTTTATTAGTTTTTTGGAGTTTTTTTTATATCGTACGTTGGGTTAGGTATATGGTTGTTTATTTTTTTTAGTTTTTATAGTATAGAGTAGGGTAGGTTATTTTATTATGTTGTATATAGGAAGTATTGGTATTGTTGGTGTGAGTGGTGTGTGTTTGTTTGTTATTATTTGATTGTTGATTAGGATGATGGGGATAGTAGAGGTTAGGGGTAGGAAGGAAAAGGGTTAGGATAAAAATATAAATGTATTGTGGGATGAGGAAAAGGAATAGAGAATTTGGTTTTATTGGAGATTATAATAGAAGGTGATATAGTTTTGTTTTTGTTTTTTTATTTTGAATGATTTTAGTTTTTTTTTAGTGAAGTTGGTAGATTGAGTTAGGTTTTATAGATTTATTATTTGGGGTTTTTTAAATTTTGTAGGAGAGTAAGGGTTGTTTATAGGTGGTAAGTTAGGATATATTTTGGTGTTGGGGGTTAAGTGGTTTGTTATTTTAAGGGAATAGTGTGGGTTGTAATTTGGGAGTATTAAGTATTTGGTTTGTGTTTATAGTTTTAGTTTAGATGTAGTTTGATTGAAATTTGGTTGTATTAGTGGAGGGGGTTATATGTTTT

>13

AGATATATTGGAGAAGTTTTGGATGATTTGGGGATTTTGATTATATAGGTTTTAAGTAGGTTTTATTTTATTTTAAATAGTAAGAAATTTTTAATAATTTTATTTAGAAGGTATTGTTTTTATTAGTTTTTTGGAGTTTTTTTTATATTGTATGTTGGGTTAGGTATATGGTTGTTTATTTTTTTTAGTTTTTATAGTATAGAGTAGGGTAGGTTATTTTATTATGTTGTATATAGGAAGTATTGGTATTGTTGGTGTGAGTGGTGTGTGTTTGTTTGTTATTATTTGATTGTTGATTAGGATGATGGGGATAGTAGAGGTTAGGGGTAGGAAGGAAAAGGGTTAGGATAAAAATATAAATGTATTGTGGGATGAGGAAAAGGAATAGAGAATTTGGTTTTATTGGAGATTATAATAGAAGGTGATATAGTTTTGTTTTTGTTTTTTTATTTTGAATGATTTTAGTTTTTTTTTAGTGAAGTTGGTAGATTGAGTTAGGTTTTATAGATTTATTATTTGGGGTTTTTTAAATTTTGTAGGAGAGTAAGGGTTGTTTATAGGTGGTAAGTTAGGATATATTTTGGTGTTGGGGGTTAAGTGGTTTGTTATTTTAAGGGAATAGTGTGGGTTGTAATTTGGGAGTATTAAGTATTTGGTTTGTGTTTATAGTTTTAGTTTAGATGTAGTTTGATTGAAATTTGGTTGTATTAGTGGAGGGGGTTATATGTTTT

>14

AGATATATTGGAGAAGTTTTGGATGATTTGGGGATTTTGATTATATAGGTTTTAAGTAGGTTTTATTTTATTTTAAATAGTAAGAAATTTTTAATAATTTTATTTAGAAGGTATTGTTTTTATTAGTTTTTTGGAGTTTTTTTTATATTGTATGTTGGGTTAGGTATATGGTTGTTTATTTTTTTTAGTTTTTATAGTATAGAGTAGGGTAGGTTATTTTATTATGTTGTATATAGGAAGTATTGGTATTGTTGGTGTGAGTGGTGTGTGTTTGTTTGTTATTATTTGATTGTTGATTAGGATGATGGGGATAGTAGAGGTTAGGGGTAGGAAGGAAAAGGGTTAGGATAAAAATATAAATGTATTGTGGGATGAGGAAAAGGAATAGAGAATTTGGTTTTATTGGAGATTATAATAGAAGGTGATATAGTTTTGTTTTTGTTTTTTTATTTTGAATGATTTTAGTTTTTTTTTAGTGAAGTTGGTAGATTGAGTTAGGTTTTATAGATTTATTATTTGGGGTTTTTTAAATTTTGTAGGAGAGTAAGGGTTGTTTATAGGTGGTAAGTTAGGATATATTTTGGTGTTGGGGGTTAAGTGGTTTGTTATTTTAAGGGAATAGTGTGGGTTGTAATTTGGGAGTATTAAGTATTTGGTTTGTGTTTATAGTTTTAGTTTAGATGTAGTTTGATTGAAATTTGGTTGTATTAGTGGAGGGGGTTATATGTTTT

>15

AGATATATTGGAGAAGTTTTGGATGATTTGGGGATTTTGATTATATAGGTTTTAAGTAGGTTTTATTTTATTTTAAATAGTAAGAAATTTTTAATAATTTTATTTAGAAGGTATTGTTTTTATTAGTTTTTTGGAGTTTTTTTTATATTGTATGTTGGGTTAGGTATATGGTTGTTTATTTTTTTTAGTTTTTATAGTATAGAGTAGGGTAGGTTATTTTATTATGTTGTATATAGGAAGTATTGGTATTGTTGGTGTGAGTGGTGTGTGTTTGTTTGTTATTATTTGATTGTTGATTAGGATGATGGGGATAGTAGAGGTTAGGGGTAGGAAGGAAAAGGGTTAGGATAAAAATATAAATGTATTGTGGGATGAGGAAAAGGAATAGAGAATTTGGTTTTATTGGAGATTATAATAGAAGGTGATATAGTTTTGTTTTTGTTTTTTTATTTTGAATGATTTTAGTTTTTTTTTAGTGAAGTTGGTAGATTGAGTTAGGTTTTATAGATTTATTATTTGGGGTTTTTTAAATTTTGTAGGAGAGTAAGGGTTGTTTATAGGTGGTAAGTTAGGATATATTTTGGTGTTGGGGGTTAAGTGGTTTGTTATTTTAAGGGAATAGTGTGGGTTGTAATTTGGGAGTATTAAGTATTTGGTTTGTGTTTATAGTTTTAGTTTAGATGTAGTTTGATTGAAATTTGGTTGTATTAGTGGAGGGGGTTATATGTTTT
