# Supplementary material for: Nondestructive enzymatic deamination enables single-molecule long-read amplicon sequencing for the determination of 5-methylcytosine and 5-hydroxymethylcytosine at single-base resolution
Source: HighWire-hosted journal article supplement (doi:10.1101/gr.265306.120), 2021-01-19
Supplement: Supplemental_Methods.docx [file Supplemental_Methods.docx]

**Supplemental Methods**

**Bisulfite conversion for the damage assay**

200 ng of mouse E14 genomic DNA sheared to 15 kb fragments were treated with sodium bisulfite using an EZ DNA Methylation-Gold Kit (Zymo Research, Irvine, CA, USA Research), or an EpiTect Bisulfite Kit (QIAGEN, Hilden, Germany), according to the manufacturers’ recommendations. Primers used to amplify bisulfite converted DNA are listed in Supplemental Table S8.

**Whole genome library preparation and sequencing**

*5mC*

50 ng mouse E14 genomic DNA, spiked with 0.5% unmethylated lambda DNA (Promega, Madison, WI, USA), was sheared to 250 bp fragments with a Covaris S2 sonicator (Covaris, Woburn, MA, USA). Fragmented DNA was used for library preparation using a NEBNext Ultra II Kit (NEB, Ipswich, MA USA) according to the manufacturer's instructions for DNA end repair, methylated adapter ligation, and size selection. The adapter ligated DNA fragments were deaminated by the enzymatic deamination method using Enzymatic Methyl-seq Conversion Module (NEB, E7125) or by sodium bisulfite using two commercially available kits: BS (1)EZ DNA Methylation-Gold Kit (Zymo Research, Irvine, CA, USA) and BS (2) EpiTect Bisulfite Kit (QIAGEN, Hilden, Germany) respectively according to the manufacturers’ recommendations. The deaminated DNA was amplified with Q5 dU Bypass DNA polymerase Master Mix (NEB, Ipswich MA, USA) and the resulting libraries were analyzed and quantified with an Agilent Bioanalyzer 2100 DNA High-sensitivity chip. All the whole-genome libraries were sequenced using the Illumina NextSeq platform with 25% phiX spike-in. Pair-end sequencing of 150 cycles (2 x 150 bp) was performed for all the sequencing runs. Base calling and demultiplexing were carried out with the standard Illumina pipeline.

*5hmC*

50 ng of mouse E14 DNA, spiked with 0.5% of methylation free lambda (Promega, Madison, WI, USA), T4gt and Xp12 phages DNA, was sheared with a Covaris S2 instrument using the recommended settings for 250 bp fragments. Sonicated DNA was then incubated with 20U of BGT (NEB, Ipswich MA, USA) in 57 ml using End Repair buffer from NEBNext Ultra II DNA library preparation kit for Illumina (NEB). Glucosylated DNA was then end repaired without purification followed by ligation to Pyrrolo-dC adaptors as indicated in NEBNext Ultra II DNA library preparation protocol (NEB, Ipswich, MA, USA) with the following modification to the protocol: TheThermolabile USER II Enzyme (M5508, NEB, Ipswich, MA, USA) was used instead of USER to open up Pyrrolo-dC loop adaptor. DNA was SPRI bead purified, denatured at 80°C in presence of 66% of formamide, and deaminated with 0.3 μg of APOBEC3A (EM-seq component E7133A) in 100 μl reaction volume (1x reaction buffer EM-seq component E7134A) for 16 hours. After SPRI bead purification, the library was amplified with NEBNext Q5U Master Mix (M0597, NEB, Ipswich MA, USA). The amplified libraries were purified and sequenced using Illumina NextSeq 500 platform with paired-end sequencing (2 X 150bp).

**PCR amplification bias assay**

Lambda (no methylation) and XP12 (all cytosines are 5mC methylated) ) phage DNA’s were mixed 1:1 ratio and 50 ng of the mix was sheared to 250 bp fragments with a Covaris S2 sonicator (Covaris, Woburn, MA, USA). Fragmented DNA was used for library preparation using a NEBNext Ultra II Kit (NEB, Ipswich, MA USA) according to the manufacturer's instructions. The libraries were deaminated by the enzymatic deamination method using Enzymatic Methyl-seq Conversion Module (NEB, Ipswich MA, USA) or by sodium bisulfite using EZ DNA Methylation-Gold Kit (Zymo Research, Irvine, CA, USA) according to the manufacturers’ recommendations. The deaminated DNA and control libraries (no enzymatic treatment) were amplified with Q5 dU Bypass DNA polymerase Master Mix (NEB, Ipswich MA, USA) and analyzed and quantified with an Agilent Bioanalyzer 2100 DNA High-sensitivity chip. All 9 libraries (3 technical repeats for each condition) were sequenced using Illumina MiSeq platform with 25% phiX spike-in.

**Global nucleoside analysis**

Genomic DNA was digested to nucleosides by treatment with the Nucleoside Digestion Mix (NEB, Ipswich MA, USA) for 1 h at 37°C. LC-MS/MS analysis was performed in duplicate by injecting digested DNA on an Agilent 1290 UHPLC equipped with a G4212A diode array detector and a 6490A Triple Quadrupole Mass Detector operating in the positive electrospray ionization mode (+ESI). UHPLC was carried out on a Waters XSelect HSS T3 XP column (2.1 × 100 mm, 2.5 μm) with the gradient mobile phase consisting of methanol and 10 mM aqueous ammonium formate (pH 4.4). MS data acquisition was performed in the dynamic multiple reaction monitoring (DMRM) mode.Each nucleoside was identified in the extracted chromatogram associated with its specific MS/MS transition: dC at m/z 228→112, 5mC at m/z 242→126, and 5hmC at m/z 258→142. External calibration curves with known amounts of the nucleosides were used to calculate their ratios within the samples analyzed

**High-throughput sequencing of the enzymatic deaminated amplicons**

*Illumina sequencing of the enzymatic deaminated amplicons*

5mC and 5hmC amplicons were pooled with the control amplicons respectively. 50 ng of each amplicon pool was fragmented to an average size of 500 bp using the Covaris S2 instrument in 50 μl of 0.1x TE buffer. Sonicated DNA was used to construct libraries with a NEBNext Ultra DNA Library Prep Kit (NEB, Ipswich, MA, USA), and sequenced on an Illumina MiSeq instrument.

*Nanopore sequencing of the enzymatic deaminated amplicons*

The 1D Native barcoding genomic DNA kit (EXP-NBD103 and SQK-LSK108 kits, Oxford Nanopore Technologies, Oxford, UK) was used for library preparation. 5mC and 5hmC amplicons were pooled with the control amplicons and were barcoded to allow for multiplexing and sequencing on the same flow cell. For each sample, end-repair and dA-tailing was performed using the NEBNext Ultra II End repair/dA-Tailing module (E7546, NEB, Ipswich, MA, USA), following Oxford Nanopore protocol, except that the incubation time was increased to 20 min. After clean-up following the end-repair step as described in the protocol, the samples were quantified using Qubit fluorometer (Thermo Fisher Scientific, Waltham MA, USA). 500 ng of each pool were ligated to a single barcode (EXP-NBD103 kit, Oxford Nanopore Technologies) following Nanopore protocol, except the ligation time was increased to 30 min. The samples were quantified with Qubit fluorometer (Thermo Fisher Scientific, Waltham MA, USA) and pooled in equimolar amounts to produce a final amount of 500 ng. The Nanopore adapter ligation was performed according to the manufacturer’s protocol. The library was sequenced for a total of 11h on a MinION (Oxford Nanopore Technologies, Oxford, UK) using a FLO-MIN106 Rev D flow cell. Raw fast5 data were generated using MinKNOW version 18.12 and base called using Guppy base caller Version 2.1.3.

*Single Molecule Real Time (SMRT) sequencing of enzymatic deaminated amplicons*

5mC and 5hmC amplicons were pooled with the control amplicons and were sequenced on PacBio Sequel platform following manufacturer's protocols (Supplemental material). and the amplicon pool (400 ng) were ligated to SMRT bell adapters (Pacific Biosciences, Menlo Park, CA, USA) using T4 DNA ligase (NEB, Ipswich, MA, USA), and the incompletely ligated amplicons were removed using Exonuclease III (NEB, Ipswich, MA, USA) and Exonuclease VII (NEB, Ipswich, MA, USA). Then the purified SMRT bell libraries were sequenced on PacBio Sequel platform following manufacturer's protocols for polymerase binding (Sequencing primer v3 and Sequel binding Kit 2.1, Pacific Biosciences, Menlo Park, CA, USA) and sequencing (Sequel sequencing kit 2.1, Pacific Biosciences, Menlo Park, CA, USA). One SMRT cell (SMRT Cell 1M v2, Pacific Biosciences, Menlo Park, CA, USA) was used for each library with a 600 min movie. Circular Consensus Sequences (CCS) were extracted from the raw movie data and converted into FASTQ file using SMRT Link (version 6.0.0.47841) CCS protocol.

**5mC and 5hmC analysis of Illumina libraries**

*Statistical inference of high-confident methylated and hydroxymethylated cytosines*

We applied a binomial distribution B (n,p) [(Lister et al. 2009)](https://paperpile.com/c/2LKh4k/yJdlX) to identify 5mC and 5hmC sites with < 1% false discovery rate. In this binomial distribution, the number of trials (n) is the sequencing depth at each cytosine position. The error rate corresponds to the probability p in the binomial distribution and was estimated from the unmethylated lambda genome. The error rates were calculated from unmethylated lambda genomic DNA ( EM-seq (5mC) error rate : 0.002 for both CpG and CpH; Bisulfite kit (1) error rate : 0.017 for CpG and 0.018 for CpH; Bisulfite method (2) error rate :0.004 for both CpG and CpH). For 5hmC detection libraries made using APOBEC(5hmC) method, the non-conversion error rate of unmodified cytosines is estimated from unmethylated lambda DNA and was 0.001 for both CpG and CpH. The non-conversion error rate of methylated cytosines was estimated from fully methylated XP12 genomic DNA and was 0.01 for all both CpG and CpH.

*Genotype correction for methylated cytosines*

Because the mouse embryonic stem cells used in this study have different genotypes from the mouse reference sequence (mm9), we examined the sequencing data of the +1 position of every identified methylated cytosines in non-CpG context (w.r.t the reference sequence) to determine whether the base is a true H or a SNP of G in our cell line. If the sequenced bases of the +1 position from both strands consistently indicate guanine (i.e., the corresponding bases on the opposite strand were either cytosine or thymine – converted from unmethylated cytosine), we then correct the methylation context to mCpG. If the +1 bases were heterozygous for a SNP, we then discarded them from the analysis.

*Correlation analysis of read coverage and cytosine content*

We first removed all the PCR duplicates and used Read 1 of aligned read pairs with high mapping quality (MAPQ>20) for this analysis. We calculated the number of the original cytosines and the number of converted cytosines for each aligned read. The distribution of reads with respect to bins of different cytosine content (cytosine content is calculated as number of Cs/alignment length and is divided into 20 bins at 5% intervals) or bins of different density of converted cytosines (density of converted cytosines is calculated as number of converted Cs/ alignment length) was calculated for each library. And the distribution was further normalized to the distribution of 100 bp windows across the entire reference genome (mm9) with respect to background cytosine content.

*Correlating 5mC and 5hmC to ChIP-seq Data Sets*

All the external ChIP-seq data sets were downloaded from the NCBI GEO database (TET1: GSE24843 [(Williams et al. 2011)](https://paperpile.com/c/2LKh4k/Uo7HQ); RNA polymerase II: GSE12241 [(Mikkelsen et al. 2007)](https://paperpile.com/c/2LKh4k/2IkEs),Transcription factors: GSE11431 [(Chen et al. 2008)](https://paperpile.com/c/2LKh4k/7Wq1G). Histone modification marks H3K4me3: GSE12241 [(Mikkelsen et al. 2007)](https://paperpile.com/c/2LKh4k/2IkEs) and H3K4me1: GSE24165 [(Creyghton et al. 2010)](https://paperpile.com/c/2LKh4k/4jJJV). For TET1, RNA polymerase II and histone marks, we downloaded the mapped reads of the ChIP-seq experiments and used the MACS2 program [(Zhang et al. 2008)](https://paperpile.com/c/2LKh4k/6rTax) to identify peaks of binding sites of each data set (Tet1: peak p value< 10-8, fold enrichment over IgG > 10; RNA polymerase II: peak p value < 10-5, fold enrichment over control > 10; histone marks: peak p value < 10-5, fold enrichment over control H3 > 10). For datasets that were originally mapped to the mm8 reference genome (RNA polymerase II and histone modification marks) we remapped them to the mm9 reference using the liftOver tool [(Hinrichs et al. 2006)](https://paperpile.com/c/2LKh4k/jj2BP) prior to the MACS2 peak calling analysis.

For the 13 transcription factors we used the predicted binding sites directly and remapped the genomic coordinates to the mm9 reference using the liftOver tool [(Hinrichs et al. 2006)](https://paperpile.com/c/2LKh4k/jj2BP). 5mC and 5hmC sites were mapped to individual regions using BEDTools [(Quinlan and Hall 2010)](https://paperpile.com/c/2LKh4k/8Ya5l). Site density was calculated as the number of sites divided by region length. 5mC and 5hmC densities were also normalized by background cytosine and 5mC densities respectively. Average densities were then computed for each bin position and were used for meta-plots or global trend plots.

**References**

[Chen X, Xu H, Yuan P, Fang F, Huss M, Vega VB, Wong E, Orlov YL, Zhang W, Jiang J, et al. 2008. Integration of external signaling pathways with the core transcriptional network in embryonic stem cells. *Cell* **133**: 1106–1117.](http://paperpile.com/b/2LKh4k/7Wq1G)

[Creyghton MP, Cheng AW, Welstead GG, Kooistra T, Carey BW, Steine EJ, Hanna J, Lodato MA, Frampton GM, Sharp PA, et al. 2010. Histone H3K27ac separates active from poised enhancers and predicts developmental state. *Proc Natl Acad Sci U S A* **107**: 21931–21936.](http://paperpile.com/b/2LKh4k/4jJJV)

[Hinrichs AS, Karolchik D, Baertsch R, Barber GP, Bejerano G, Clawson H, Diekhans M, Furey TS, Harte RA, Hsu F, et al. 2006. The UCSC Genome Browser Database: update 2006. *Nucleic Acids Res* **34**: D590–598.](http://paperpile.com/b/2LKh4k/jj2BP)

[Lister R, Pelizzola M, Dowen RH, Hawkins RD, Hon G, Tonti-Filippini J, Nery JR, Lee L, Ye Z, Ngo Q-M, et al. 2009. Human DNA methylomes at base resolution show widespread epigenomic differences. *Nature* **462**: 315–322.](http://paperpile.com/b/2LKh4k/yJdlX)

[Mikkelsen TS, Ku M, Jaffe DB, Issac B, Lieberman E, Giannoukos G, Alvarez P, Brockman W, Kim TK, Koche RP, et al. 2007. Genome-wide maps of chromatin state in pluripotent and lineage-committed cells. *Nature* **448**: 553–560.](http://paperpile.com/b/2LKh4k/2IkEs)

[Quinlan AR, Hall IM. 2010. BEDTools: a flexible suite of utilities for comparing genomic features. *Bioinformatics* **26**: 841–842.](http://paperpile.com/b/2LKh4k/8Ya5l)

[Williams K, Christensen J, Pedersen MT, Johansen JV, Cloos PAC, Rappsilber J, Helin K. 2011. TET1 and hydroxymethylcytosine in transcription and DNA methylation fidelity. *Nature* **473**: 343–348.](http://paperpile.com/b/2LKh4k/Uo7HQ)

[Zhang Y, Liu T, Meyer CA, Eeckhoute J, Johnson DS, Bernstein BE, Nusbaum C, Myers RM, Brown M, Li W, et al. 2008. Model-based analysis of ChIP-Seq (MACS). *Genome Biol* **9**: R137.](http://paperpile.com/b/2LKh4k/6rTax)
