# Supplementary material for: Nondestructive enzymatic deamination enables single-molecule long-read amplicon sequencing for the determination of 5-methylcytosine and 5-hydroxymethylcytosine at single-base resolution
Source: HighWire-hosted journal article supplement (doi:10.1101/gr.265306.120), 2021-01-19
Supplement: Supplemental_Table_S1.docx [file Supplemental_Table_S1.docx]

**Supplemental Table S1. Comparison of bisulfite free methods for targeted DNA methylation profiling.**

| Method | LR EM-seq | lrTAPS | ACE-seq |
| --- | --- | --- | --- |
| 5mC detection | Yes | Yes | No |
| 5hmC detection | Yes | Yes (indirect) | Yes |
| DNA damage | No | No | No |
| Applied to long read sequencing | Yes | Yes | No  - |
| Are new sequence analysis tools needed? | No | Yes | No |
| Is specialized equipment needed? | No | Yes; chemical fume hood is needed for handling of pyridine borane | No |
