# Supplementary material for: Nondestructive enzymatic deamination enables single-molecule long-read amplicon sequencing for the determination of 5-methylcytosine and 5-hydroxymethylcytosine at single-base resolution
Source: HighWire-hosted journal article supplement (doi:10.1101/gr.265306.120), 2021-01-19
Supplement: Supplemental_Table_S2.docx [file Supplemental_Table_S2.docx]

**Supplemental Table S2. Conversion rates in EM-seq, bisulfite sequencing and published bisulfite sequencing studies.**

| **ID** | **Conversion Rate%** | **Method** | **Conversion Rate Estimation Method** | **Study Organism** | **Reference** |
| --- | --- | --- | --- | --- | --- |
| APOBEC (r1) | 99.8 | APOBEC (5mC) | unmethylated lambda DNA | mouse | Present study |
| APOBEC  (r2) | 99.8 | APOBEC (5mC) | unmethylated lambda DNA | mouse | Present study |
| BS1 (r1) | 98.3 | WGBS | unmethylated lambda DNA | mouse | Present study |
| BS1 (r2) | 98.2 | WGBS | unmethylated lambda DNA | mouse | Present study |
| BS2 (r1) | 99.6 | WGBS | unmethylated lambda DNA | mouse | Present study |
| BS2 (r2) | 99.6 | WGBS | unmethylated lambda DNA | mouse | Present study |
| 1 | 99.3~99.8 | WGBS | unmethylated lambda DNA | human | [(Lister et al. 2009)](https://paperpile.com/c/ud3Vg3/xg8uN) |
| 2 | 99.2~99.6 | WGBS* | unmethylated lambda DNA | human, mouse | [(Davis et al. 2018)](https://paperpile.com/c/ud3Vg3/5r6yO) |
| 3 | 99.5 | WGBS | unmethylated lambda DNA | mouse | [(Xie et al. 2012)](https://paperpile.com/c/ud3Vg3/kpSgr) |
| 4 | 98.5~99.6 | WGBS** | unmethylated lambda DNA | human | [(Roadmap Epigenomics Consortium et al. 2015)](https://paperpile.com/c/ud3Vg3/E3kwI) |
| 5 | 97.2~99.8 | WGBS | unmethylated lambda DNA | Zebrafish, Xenopus tropicalis, mouse | [(Bogdanovic et al. 2016)](https://paperpile.com/c/ud3Vg3/bqwSh) |
| 6 | 97.7 | single cell WGBS | non-CpG sites | mouse | [(Smallwood et al. 2014)](https://paperpile.com/c/ud3Vg3/3F8uc) |
| 7 | >99 | single cell WGBS | custom-designed unmethylated oligonucleotides | human and mouse | [(Farlik et al. 2015)](https://paperpile.com/c/ud3Vg3/yCGkE) |
| 8 | 97.6~ 99.1 | single cell WGBS | non-CpG sites in the genome | mouse | [(Gravina et al. 2016)](https://paperpile.com/c/ud3Vg3/KavXe) |
| 9 | >97 | RRBS |  | mammals | [(Smith et al. 2009)](https://paperpile.com/c/ud3Vg3/YzkKP) |
| 10 | >=99 | ERRBS  (enhanced RRBS) | Unmethylated C | human and other animals | [(Garrett-Bakelman et al. 2015)](https://paperpile.com/c/ud3Vg3/n1Rlp) |
| 11 | 97 | SMRT -BS | non-CpG Cytosines | human | [(Yang et al. 2015)](https://paperpile.com/c/ud3Vg3/XTOck) |

* We randomly sampled and analyzed 6 WGBS datasets from the ENCODE portal (https://www.encodeproject.org/) with the following accession numbers: ENCSR634OPL, ENCSR608JPV, ENCSR482VHG, ENCSR752OCM, ENCSR598OBF, ENCSR462KQY (Supplemental Table S3)

** This study also conducted RRBS and MeDIP-seq, but only WGBS conversion rates were reported here.

**References**

[Bogdanovic O, Smits AH, de la Calle Mustienes E, Tena JJ, Ford E, Williams R, Senanayake U, Schultz MD, Hontelez S, van Kruijsbergen I, et al. 2016. Active DNA demethylation at enhancers during the vertebrate phylotypic period. *Nat Genet* **48**: 417–426.](http://paperpile.com/b/ud3Vg3/bqwSh)

[Davis CA, Hitz BC, Sloan CA, Chan ET, Davidson JM, Gabdank I, Hilton JA, Jain K, Baymuradov UK, Narayanan AK, et al. 2018. The Encyclopedia of DNA elements (ENCODE): data portal update. *Nucleic Acids Res* **46**: D794–D801.](http://paperpile.com/b/ud3Vg3/5r6yO)

[Farlik M, Sheffield NC, Nuzzo A, Datlinger P, Schönegger A, Klughammer J, Bock C. 2015. Single-Cell DNA Methylome Sequencing and Bioinformatic Inference of Epigenomic Cell-State Dynamics. *Cell Rep* **10**: 1386–1397.](http://paperpile.com/b/ud3Vg3/yCGkE)

[Garrett-Bakelman FE, Sheridan CK, Kacmarczyk TJ, Ishii J, Betel D, Alonso A, Mason CE, Figueroa ME, Melnick AM. 2015. Enhanced Reduced Representation Bisulfite Sequencing for Assessment of DNA Methylation at Base Pair Resolution. *J Vis Exp* e52246.](http://paperpile.com/b/ud3Vg3/n1Rlp)

[Gravina S, Dong X, Yu B, Vijg J. 2016. Single-cell genome-wide bisulfite sequencing uncovers extensive heterogeneity in the mouse liver methylome. *Genome Biol* **17**: 150.](http://paperpile.com/b/ud3Vg3/KavXe)

[Lister R, Pelizzola M, Dowen RH, Hawkins RD, Hon G, Tonti-Filippini J, Nery JR, Lee L, Ye Z, Ngo QM, et al. 2009. Human DNA methylomes at base resolution show widespread epigenomic differences. *Nature* **462**: 315–322.](http://paperpile.com/b/ud3Vg3/xg8uN)

[Roadmap Epigenomics Consortium, Kundaje A, Meuleman W, Ernst J, Bilenky M, Yen A, Heravi-Moussavi A, Kheradpour P, Zhang Z, Wang J, et al. 2015. Integrative analysis of 111 reference human epigenomes. *Nature* **518**: 317–330.](http://paperpile.com/b/ud3Vg3/E3kwI)

[Smallwood S a., Lee HJ, Angermueller C, Krueger F, Saadeh H, Peat J, Andrews SR, Stegle O, Reik W, Kelsey G. 2014. Single-cell genome-wide bisulfite sequencing for assessing epigenetic heterogeneity. *Nat Methods* **11**.](http://paperpile.com/b/ud3Vg3/3F8uc) <http://dx.doi.org/10.1038/nmeth.3035>[.](http://paperpile.com/b/ud3Vg3/3F8uc)

[Smith ZD, Gu H, Bock C, Gnirke A, Meissner A. 2009. High-throughput bisulfite sequencing in mammalian genomes. *Methods* **48**: 226–232.](http://paperpile.com/b/ud3Vg3/YzkKP)

[Xie W, Barr CL, Kim A, Yue F, Lee AY, Eubanks J, Dempster EL, Ren B. 2012. Base-resolution analyses of sequence and parent-of-origin dependent DNA methylation in the mouse genome. *Cell* **148**: 816–831.](http://paperpile.com/b/ud3Vg3/kpSgr)

[Yang Y, Sebra R, Pullman BS, Qiao W, Peter I, Desnick RJRJ, Geyer CR, DeCoteau JF, Scott SASA. 2015. Quantitative and multiplexed DNA methylation analysis using long-read single-molecule real-time bisulfite sequencing (SMRT-BS). *BMC Genomics* **16**: 350.](http://paperpile.com/b/ud3Vg3/XTOck)
