# Supplementary material for: Nondestructive enzymatic deamination enables single-molecule long-read amplicon sequencing for the determination of 5-methylcytosine and 5-hydroxymethylcytosine at single-base resolution
Source: HighWire-hosted journal article supplement (doi:10.1101/gr.265306.120), 2021-01-19
Supplement: Supplemental_Table_S3.docx [file Supplemental_Table_S3.docx]

**Supplemental Table S3. ENCODE datasets analyzed in this study**

| **Lab** | **Species** | **Sample** | **ENCODE accession numbers** |
| --- | --- | --- | --- |
| Joe Ecker, Salk | Mus musculus | midbrain embryo | ENCSR634OPL |
| Joe Ecker, Salk | Homo sapiens | adipose tissue | ENCSR608JPV |
| Joe Ecker, Salk | Homo sapiens | H1 embryonic stem cell | ENCSR482VHG |
| Richard Myers, HAIB | Homo sapiens | tibial nerve | ENCSR752OCM |
| Richard Myers, HAIB | Homo sapiens | stomach | ENCSR598OBF |
| John Stamatoyannopoulos, UW  Zhiping Weng, UMass | Homo sapiens | large intestine | ENCSR462KQY |
