# Supplementary material for: Nondestructive enzymatic deamination enables single-molecule long-read amplicon sequencing for the determination of 5-methylcytosine and 5-hydroxymethylcytosine at single-base resolution
Source: HighWire-hosted journal article supplement (doi:10.1101/gr.265306.120), 2021-01-19
Supplement: Supplemental_Table_S4.docx [file Supplemental_Table_S4.docx]

**Supplemental Table S4. Conversion rates of Enzymatic deamination, TAB-seq, ACE-seq and Illumina-TAPS.**

| **Method** | **C**  **conversion rate** | **5mC**  **conversion rate** | **5hmC protection** | **Reference** |
| --- | --- | --- | --- | --- |
| **Enzymatic deamination** | 99.8 | 97.5 | 98.3 | current study |
| **TAB-seq** | 99.62 | 97.79 | 84.4~92 | [(Yu et al. 2012)](https://paperpile.com/c/6AN4Hp/31AEB) |
| **TAB-seq** | 99.57 | 98.47 | 57 | [(Bogdanovic et al. 2016)](https://paperpile.com/c/6AN4Hp/dsPDb) |
| **TAB-seq** | 99.99 | 99.98 | 75 | [(Bogdanovic et al. 2016)](https://paperpile.com/c/6AN4Hp/dsPDb) |
| **TAB-seq** | 98.3 | 99.61 | 55.91 | [(Bogdanovic et al. 2016)](https://paperpile.com/c/6AN4Hp/dsPDb) |
| **ACE-seq** | 99.9% CHG  99.9% CHH  99.5% CpG | 97% | CHG 98.6%  CHH 98.5%  CpG 98.5% | [(Schutsky et al. 2018)](https://paperpile.com/c/6AN4Hp/shqfU) |
| **Illumina-TAPS** | mTet1CD:  99.77%  hTet2:  99.81% | mTet1CD:  5mCpG 97.3%  5mCpH 85.9%  hTet2:  5mCpG 97.3%  5mCpH 74.0% | mTet1CD:  5hmCpG 89.1%  5hmCpH 80.5%  hTet2:  5hmCpG 88.2%  5hmCpH 66.2% | [(Liu et al. 2020)](https://paperpile.com/c/6AN4Hp/qptd2) |

**References**

[Bogdanovic O, Smits AH, de la Calle Mustienes E, Tena JJ, Ford E, Williams R, Senanayake U, Schultz MD, Hontelez S, van Kruijsbergen I, et al. 2016. Active DNA demethylation at enhancers during the vertebrate phylotypic period. *Nat Genet* **48**: 417–426.](http://paperpile.com/b/6AN4Hp/dsPDb)

[Liu Y, Cheng J, Siejka-Zieli?ska P, Weldon C, Roberts H, Lopopolo M, Magri A, D’Arienzo V, Harris JM, McKeating JA, et al. 2020. Accurate targeted long-read DNA methylation and hydroxymethylation sequencing with TAPS. *Genome Biol* **21**: 54.](http://paperpile.com/b/6AN4Hp/qptd2)

[Schutsky EK, DeNizio JE, Hu P, Liu MY, Nabel CS, Fabyanic EB, Hwang Y, Bushman FD, Wu H, Kohli RM. 2018. Nondestructive, base-resolution sequencing of 5-hydroxymethylcytosine using a DNA deaminase. *Nat Biotechnol* **36**: 1083–1090.](http://paperpile.com/b/6AN4Hp/shqfU)

[Yu M, Hon GCC, Szulwach KEE, Song C-X, Zhang L, Kim A, Li X, Dai Q, Shen Y, Park B, et al. 2012. Base-resolution analysis of 5-hydroxymethylcytosine in the mammalian genome. *Cell* **149**: 1368–1380.](http://paperpile.com/b/6AN4Hp/31AEB)
