# Supplementary material for: Nondestructive enzymatic deamination enables single-molecule long-read amplicon sequencing for the determination of 5-methylcytosine and 5-hydroxymethylcytosine at single-base resolution
Source: HighWire-hosted journal article supplement (doi:10.1101/gr.265306.120), 2021-01-19
Supplement: Supplemental_Table_S5.docx [file Supplemental_Table_S5.docx]

**Supplemental Table S5.**  **Hydroxymethylation quantification results for six mouse tissue/cell types by the enzymatic deamination method**

| **Cell/Tissue** | **5hmCpG%**  **(r1, r2)** | **5hmCpH%**  **(r1, r2)** |
| --- | --- | --- |
| **DNMT TKO** | 0.2, 0.3 | 0.1, 0.2 |
| **NIH/3T3** | 0.5, 0.5 | 0.1, 0.1 |
| **Spleen** | 1.6, 1.7 | 0.1, 0.2 |
| **E14** | 1.6, 1.6 | 0.1, 0.1 |
| **Heart** | 4.8, 4.8 | 0.2, 0.2 |
| **Brain** | 15.0, 15.0 | 0.2, 0.2 |
