# Supplementary material for: Nondestructive enzymatic deamination enables single-molecule long-read amplicon sequencing for the determination of 5-methylcytosine and 5-hydroxymethylcytosine at single-base resolution
Source: HighWire-hosted journal article supplement (doi:10.1101/gr.265306.120), 2021-01-19
Supplement: Supplemental_Table_S6.docx [file Supplemental_Table_S6.docx]

**Supplemental Table S6. Enzymatic 5hmC library sequencing metrics**

| Starting Material | Replicate | Reads (million) | mapping efficiency | duplication level | CpG hmC% | CpH hmC% |
| --- | --- | --- | --- | --- | --- | --- |
| 50ng mES gDNA | 1 | 127 | 67.5% | 4.2% | 4.7 | 0.1 |
| 50ng mES gDNA | 2 | 124 | 68.6% | 4.3% | 4.7 | 0.2 |
| 1ng mES gDNA | 1 | 165 | 69.9% | 58.9% | 4.4 | 0.1 |
| 1ng mES gDNA | 2 | 145 | 70.1% | 57.0% | 4.4 | 0.1 |
