# Supplementary material for: Nondestructive enzymatic deamination enables single-molecule long-read amplicon sequencing for the determination of 5-methylcytosine and 5-hydroxymethylcytosine at single-base resolution
Source: HighWire-hosted journal article supplement (doi:10.1101/gr.265306.120), 2021-01-19
Supplement: Supplemental_Table_S7.docx [file Supplemental_Table_S7.docx]

**Supplemental Table S7. Percentage of unconverted cytosines of various sequence contexts calculated from the SMRT sequencing reads of the 4616 bp Inpp5f DMR amplicon obtained using LR-EM-seq.**

| **5mC context** | **number of unconverted Cs (modified)** | **number of converted Cs (unmodified)** | **Unconverted C (%)** |
| --- | --- | --- | --- |
| **CpA** | 810 | 104053 | 0.8 |
| **CpC** | 106 | 81165 | 0.1 |
| **CpG** | 25653 | 20166 | 56.0 |
| **CpT** | 315 | 122910 | 0.3 |
| **CpC, CpT** | 421 | 204075 | 0.2 |
| **CpH (A,C,T)** | 1231 | 308128 | 0.4 |
|  | | | |
| **5hmC context** | **number of unconverted Cs (modified)** | **number of converted Cs (unmodified)** | **Unconverted C (%)** |
| **CpA** | 178 | 63849 | 0.3 |
| **CpC** | 56 | 49772 | 0.1 |
| **CpG** | 2122 | 25928 | 7.6 |
| **CpT** | 73 | 75623 | 0.1 |
