# Supplementary material for: Nondestructive enzymatic deamination enables single-molecule long-read amplicon sequencing for the determination of 5-methylcytosine and 5-hydroxymethylcytosine at single-base resolution
Source: HighWire-hosted journal article supplement (doi:10.1101/gr.265306.120), 2021-01-19
Supplement: Supplemental_Table_S8.docx [file Supplemental_Table_S8.docx]

**Supplemental Table S8: Primers for DNA damage assay**

| Primers for DNA Integrity assessment | | |
| --- | --- | --- |
| Amplicon size (bp) | Forward primer | Reverse primer |
| 388 | TAGGATAAAAATATAAATGTATTGTGGGATGAGG | AAAACATATAACCCCCTCCACTAATAC |
| 731 | AGATATATTGGAGAAGTTTTGGATGATTTGG | AAAACATATAACCCCCTCCACTAATAC |
| 1456 | TAAGATTAAGGTAGGTTGGATTTGG | TCATTACTCCCTCTCCAAAAATTAC |
| 2018 | AAGATTTAAGGGAAGGTTGAATAGG | ACCTACAAAACCTTACAAACATAAC |
| 3325 | TGGAGTTTGTTGGGGGGTTTGTTGTTTAAG | TCTAACCCTCACCACCTTCCTAATACCCAA |
| 4229 | TGGTAAAGGTTAAGAAGGGAAGATTGTGGA | AACCCTACTTCCCCCTAACAAATTTTCAAC |
| Primers for qPCR assay (Fig. 2Ac) | | |
| 336 | AGATATATTGGAGAAGTTTTGGATGATTTGG | TCCTTCCTACCCCTAACCTCTACTA |
| 456 | TTTATAGGTTGTTTGTTGTTGGAATTTTTTTTG | TCCTTCCTACCCCTAACCTCTACTA |
| 577 | AGATTAAGGTAGGTTGGATTTGGGGATTTAAG | TCCTTCCTACCCCTAACCTCTACTA |
| 809 | TTGGGTTTAGTGATTATTGGGAGGTTAG | TCCTTCCTACCCCTAACCTCTACTA |
