# Supplementary material for: Nondestructive enzymatic deamination enables single-molecule long-read amplicon sequencing for the determination of 5-methylcytosine and 5-hydroxymethylcytosine at single-base resolution
Source: HighWire-hosted journal article supplement (doi:10.1101/gr.265306.120), 2021-01-19
Supplement: Supplemental_Table_S9.docx [file Supplemental_Table_S9.docx]

**Supplemental Table S9: Primers used in the LR-EM-seq experiments**

| Amplicon coordinates | Associated gene | Forward Primer | Reverse Primer | Used for |
| --- | --- | --- | --- | --- |
| Chr7:135829750-135832151 | *Inpp5f* (imprinted) | GGAAGAAAGTGAGTTGATATTTTAGAGTTAG | CACTAACACTTTAACCATAAATCCTACAA | 129X1/SvJ and Cast/EiJ mouse brain |
| Chr7:135829750-135832875 | *Inpp5f* (imprinted) | GGAAGAAAGTGAGTTGATATTTTAGAGTTAG | CATAAACTCATTCTACCAACCAATATC | F1 (129X1/SvJ male and Cast/EiJ female) brain |
| Chr7:135829567-135834182 | *Inpp5f* (imprinted) | TGATATTTAGGGTTGTTAAGGTTTGA | CAACAACACTTCCACATCTCTATAC | mouse brain |
| Chr2:174150371-174153639 | *Gnas1a* (imprinted) | TATAGTAATGTTGTTGTTTTTGAAAGTAGATG | ACTATTACCCTTAAATACTCCTTAAATTAACTCTT | 129X1/SvJ and Cast/EiJ mouse brain |
| Chr2:174152457-174154782 | *Gnas1a* (imprinted) | AGGAAGGTGGTTTAAAATTTTTGAT | AACCCAAAAACACTCTAAAACAAC | 129X1/SvJ and Cast/EiJ mouse brain |
| Chr7:69607178-69610032 | *Peg12* (imprinted) | AGGGTTAGAAGGAGGAAATTAATTT | CTAATATAATTATCCAAATTCCCATTCAA | 129X1/SvJ and Cast/EiJ mouse brain |
| Chr2:152511205-152514436 | *H13* (imprinted) | AATTAAGAGGTTTTGGTTTGTTGGT | ACACCAAATCCTTAATATCAAACTCATA | 129X1/SvJ and Cast/EiJ mouse brain |
| Chr8:46107176-46112553 | *FAT1* | AATGAAGGAAATGAATTTGGTAGAG | TCCCAAATACATAAATCCACACTTA | mouse embryonic stem cell |
| T4 phage  5357 bp | N/A | GCATAGTTCATTGAAGAGGATTTAATAG | CAACAAAACGATAAAAAGTTGTTTAC | T4 phage  Control for 5hmC protection |
| Lambda phage  3233 bp | N/A | TAGTGAGGTAGATTTTTAGTTAGGAATTATTG | TACATATTCTACAACATATCAAACATCTTCAT | Lambda phage  Control for C deamination rates |
| CpG methylated pUC19  1774 bp | N/A | GGAAGTATAAAGTGTAAAGTTTGGGGTG | ATTTTCCAATAATAAACACTTTTAAAATTC | CpG methylated pUC19  Control for 5mC protection |
