# Supplementary material for: Nondestructive enzymatic deamination enables single-molecule long-read amplicon sequencing for the determination of 5-methylcytosine and 5-hydroxymethylcytosine at single-base resolution
Source: HighWire-hosted journal article supplement (doi:10.1101/gr.265306.120), 2021-01-19
Supplement: Supplemental_Text_S1.docx [file Supplemental_Text_S1.docx]

**Supplemental Text S1: Whole-genome 5mC detection by enzymatic deamination method**

To demonstrate our enzymatic deamination method for accurate identification of 5mC, we used control samples consisting of 100 ng mouse embryonic stem cell (E14) genomic DNA spiked with 0.5% methylation free lambda DNA. We also performed two Whole-Genome Bisulfite Sequencing (WGBS) on the same starting material using two widely used bisulfite conversion kits BS kit 1 and BS kit 2 (**Methods**) for comparison. Two technical replicates were also performed for all the three protocols (APOBEC(5mC), BS kit 1 and BS kit2) to assess reproducibility of the methods. The conversion rates and methylation results were highly consistent between all the technical replicates (Supplemental Fig. S1A-B).

The resulting libraries were sequenced using Illumina platform and down-sampled to 118 million reads per library. The resulting paired-end reads were mapped to the mouse genome (mm9) and the phage lambda genome (**Methods**). From the unmethylated phage lambda, enzymatic deamination experiments show consistent good conversion rates of 99.8% (Supplemental table S2) and no apparent sequence preference for non-conversion errors (Fig. 1B-C, Supplemental Fig. S1A). In comparison, the conversion rates of bisulfite treated lambda DNA are ranging from 98.2 % to 99.6 % depending on the BS kit used, which is in line with the usual conversion rates reported in the literature for whole genome bisulfite sequencing (WGBS) (Supplemental table S2). For the bisulfite treated DNA, we observed a higher level of residual unconverted cytosines in CpA context. This CpA bias is also observed with the published WGBS datasets which we randomly sampled from the ENCODE Project across different labs, protocols and cell types (Supplemental table S3, Fig. 1C). This bias leads to 6 to 23-fold more false positive high-confident methylated CpA in WGBS compared to enzymatic conversion (Supplemental Fig. S1C). This overestimation of the amount of methylated CpA in bisulfite treatment is anticipated to directly confound the identification of methylation in non-CpG context. This may alter the interpretation of epigenetic marks in especially CpA context, a predominant non-CpG methylation recently reported in embryonic stem cells [(Lister et al. 2009; Laurent et al. 2010; Ziller et al. 2011; Ramsahoye et al. 2000)](https://paperpile.com/c/ne7gEh/fgMAk+jH3Um+09R4g+oAy6w), brain [(Lister et al. 2013; Xie et al. 2012; Guo et al. 2014)](https://paperpile.com/c/ne7gEh/VZepR+GaFF0+TBe1w) and germ cells [(Ichiyanagi et al. 2013)](https://paperpile.com/c/ne7gEh/bPrX7).

Identification of CpG methylation in the mouse DNA reveals consistent results between enzymatic deamination and WGBS. CpG methylation calls between enzymatic conversion and bisulfite sequencing are ~96% agreement (Supplemental Fig. S1D) and all the three protocols displayed the same characteristic bimodal distribution of genome-wide CpG methylation abundance (Supplemental Fig. S1E) Furthermore, CpG methylation levels revealed using the enzymatic conversion method are well correlated with repressive and active chromatin markers in the mouse stem cells showing expected depletion in the active transcription regions (H3K4me3 and H3K27ac) and promoters (RNA polymerase II binding sites) (Fig. 1E).

Genome-wide investigation of the read distribution in the mouse genome reveals that the enzymatic deamination method produces more even sequencing coverage than the bisulfite conversion based sequencing methods (Supplemental Fig. S2A) and consequently yields more useful data. For example, at an equal amount of sequencing reads (118M) and considering only sites with at least 5X coverage (minimal coverage for methylation calling), enzymatic conversion covers 79% of all CpG pairs compared to 73% of CpG pairs in WGBS. This difference corresponds to 1.2 million additional CpG pairs in the enzymatic conversion method as a result of a more uniform genome-wide sequencing coverage compared to both WGBS. More uniform coverage from enzymatic deamination results in a notable increase in coverage particularly in CpG rich regions of the genome such as promoters and CpG islands (Supplemental Fig. S2B). We reasoned that bisulfite-induced damage at cytosines can result in a bias in coverage for WGBS and investigated the relationship between read coverage and cytosine density. Supporting large scale damage at cytosine previously reported [(Olova et al. 2018)](https://paperpile.com/c/ne7gEh/xzesP), coverage of WGBS is inversely correlated with cytosine and deaminated cytosines densities. Consequently, read mapping to regions containing fewer cytosines/converted cytosines are over-represented (Supplemental Fig. S2C and supplemental Fig. S2D). On the other hand, enzymatic conversion shows more uniform coverage across wide ranges of cytosine contents and was consequently able to cover a higher fraction of CpG pairs, particularly in cytosine rich regions. Consistent with the non-destructive nature of enzymatic reaction, these results indicate that enzymatic conversion preserves the integrity of the DNA.

**References**

[Guo JU, Su Y, Shin JJH, Shin JJH, Li H, Xie B, Zhong C, Hu S, Le T, Fan G, et al. 2014. Distribution, recognition and regulation of non-CpG methylation in the adult mammalian brain. *Nat Neurosci* **17**: 215–222.](http://paperpile.com/b/ne7gEh/TBe1w)

[Ichiyanagi T, Ichiyanagi K, Miyake M, Sasaki H. 2013. Accumulation and loss of asymmetric non-CpG methylation during male germ-cell development. *Nucleic Acids Res* **41**: 738–745.](http://paperpile.com/b/ne7gEh/bPrX7)

[Laurent L, Wong E, Li G, Huynh T, Tsirigos A, Ong CT, Low HM, Kin Sung KW, Rigoutsos I, Loring J, et al. 2010. Dynamic changes in the human methylome during differentiation. *Genome Res* **20**: 320–331.](http://paperpile.com/b/ne7gEh/jH3Um)

[Lister R, Mukamel EA, Nery JR, Urich M, Puddifoot CA, Johnson ND, Lucero J, Huang Y, Dwork AJ, Schultz MD, et al. 2013. Global epigenomic reconfiguration during mammalian brain development. *Science* **341**: 1237905.](http://paperpile.com/b/ne7gEh/VZepR)

[Lister R, Pelizzola M, Dowen RH, Hawkins RD, Hon G, Tonti-Filippini J, Nery JR, Lee L, Ye Z, Ngo QM, et al. 2009. Human DNA methylomes at base resolution show widespread epigenomic differences. *Nature* **462**: 315–322.](http://paperpile.com/b/ne7gEh/fgMAk)

[Olova N, Krueger F, Andrews S, Oxley D, Berrens RV, Branco MR, Reik W. 2018. Comparison of whole-genome bisulfite sequencing library preparation strategies identifies sources of biases affecting DNA methylation data. *Genome Biol* **19**: 33.](http://paperpile.com/b/ne7gEh/xzesP)

[Ramsahoye BH, Biniszkiewicz D, Lyko F, Clark V, Bird AP, Jaenisch R. 2000. Non-CpG methylation is prevalent in embryonic stem cells and may be mediated by DNA methyltransferase 3a. *Proc Natl Acad Sci U S A* **97**: 5237–5242.](http://paperpile.com/b/ne7gEh/oAy6w)

[Xie W, Barr CL, Kim A, Yue F, Lee AY, Eubanks J, Dempster EL, Ren B. 2012. Base-resolution analyses of sequence and parent-of-origin dependent DNA methylation in the mouse genome. *Cell* **148**: 816–831.](http://paperpile.com/b/ne7gEh/GaFF0)

[Ziller MJ, Müller F, Liao J, Zhang Y, Gu H, Bock C, Boyle P, Epstein CB, Bernstein BE, Lengauer T, et al. 2011. Genomic distribution and inter-sample variation of non-CpG methylation across human cell types. *PLoS Genet* **7**: e1002389.](http://paperpile.com/b/ne7gEh/09R4g)
