# Supplementary material for: Nondestructive enzymatic deamination enables single-molecule long-read amplicon sequencing for the determination of 5-methylcytosine and 5-hydroxymethylcytosine at single-base resolution
Source: HighWire-hosted journal article supplement (doi:10.1101/gr.265306.120), 2021-01-19
Supplement: Supplemental_Text_S2.docx [file Supplemental_Text_S2.docx]

**Supplemental Text S2: Simultaneous analysis of 5mC and 5hmC in mouse embryonic stem cell**

We conducted both enzymatic 5mC and 5hmC sequencing in parallel to enable for the first time simultaneous investigation of 5mC and 5hmC using the same baseline enzymatic reaction. We first explored the relative levels of 5hmC and 5mC in TET1 binding sites previously defined in mouse E14 cell line using ChIP-seq [(Williams et al. 2011)](https://paperpile.com/c/GrusFK/NCEoW). Because TET1 is a major contributor in the oxidation of 5mC to 5hmC [(Tahiliani et al. 2009)](https://paperpile.com/c/GrusFK/rtNBL), an increased level of 5hmC is expected at TET1 binding sites. As expected, we observed a decrease of 5mC and a local enrichment of 5hmC at the binding site of the TET1 protein (Fig. 1E), which is consistent with the activity of the enzyme. We also confirmed previous observation [(Sun et al. 2013)](https://paperpile.com/c/GrusFK/zAabg) that RNA polymerase II (Pol II) binding regions have low levels of both 5mC and 5hmC (Fig. 1E) in agreement with a common understanding that core promoters of actively transcribed regions are in general depleted of cytosine modifications.

Next, we analyzed the cytosine modifications around the binding site of ESC (Embryonic stem cells) related transcription factors (Supplemental Fig. S1F). We found that, while 5mC are globally depleted in these regions, the profile of hydroxymethylation varies largely according to the type of transcription factor. Most of the transcription factors (TFs) showed increased enrichment in hydroxymethylation. Such an enrichment can be directly at the binding site (Tcfcp2l1, Stat3 and Esrrb) or is bimodal around the binding site (Nanog, Oct4, Sox2 and Klf4), suggesting that the deposition of 5hmC is not only related to the binding of transcription factors, but also affected by other factors. Strengthening this observation, we also observed that distal enhancers marked by H3K4me1 and the absence of H3K4me3 displayed similar enhanced 5hmC levels. However, the extent of 5mC depletion in the enhancer regions is less pronounced than that in the TF binding *loci* implying that 5hmC is not simply an intermediate of DNA demethylation pathway.

Some transcription factors showed no significant changes or slight depletion of 5hmC compared with the corresponding flanking regions (E2f1, Zfx, c-Myc and n-Myc) in agreement with their tendency to predominantly bind to core-promoter regions. Previous studies have reported depleted DNA methylation at DNA-protein interaction sites [(Lister et al. 2009; Stadler et al. 2011)](https://paperpile.com/c/GrusFK/9ZEv5+pofOU) and enrichment of hydroxymethylation near key transcription factor binding sites in mouse embryonic stem cells [(Yu et al. 2012)](https://paperpile.com/c/GrusFK/soZ5D). In agreement with these studies, we detected local depletion of DNA methylation at the binding sites of all the important transcription factors. Moreover, we observed lower than genome average 5mC abundance in the adjacent regions beyond the transcription factor footprints. This result implies that the depletion of DNA methylation may be primed upon other activities that affect the DNA more extensively, such as changes of chromatin structure.

**References**

[Lister R, Pelizzola M, Dowen RH, Hawkins RD, Hon G, Tonti-Filippini J, Nery JR, Lee L, Ye Z, Ngo QM, et al. 2009. Human DNA methylomes at base resolution show widespread epigenomic differences. *Nature* **462**: 315–322.](http://paperpile.com/b/GrusFK/9ZEv5)

[Stadler MB, Murr R, Burger L, Ivanek R, Lienert F, Schöler A, van Nimwegen E, Wirbelauer C, Oakeley EJ, Gaidatzis D, et al. 2011. DNA-binding factors shape the mouse methylome at distal regulatory regions. *Nature* **480**: 490–495.](http://paperpile.com/b/GrusFK/pofOU)

[Sun Z, Terragni J, Borgaro JG, Liu Y, Yu L, Guan S, Wang H, Sun D, Cheng X, Zhu Z, et al. 2013. High-resolution enzymatic mapping of genomic 5-hydroxymethylcytosine in mouse embryonic stem cells. *Cell Rep* **3**: 567–576.](http://paperpile.com/b/GrusFK/zAabg)

[Tahiliani M, Koh KP, Shen Y, Pastor WA, Bandukwala H, Brudno Y, Agarwal S, Iyer LM, Liu DR, Aravind L, et al. 2009. Conversion of 5-methylcytosine to 5-hydroxymethylcytosine in mammalian DNA by MLL partner TET1. *Science* **324**: 930–935.](http://paperpile.com/b/GrusFK/rtNBL)

[Williams K, Christensen J, Pedersen MT, Johansen JV, Cloos PAC, Rappsilber J, Helin K. 2011. TET1 and hydroxymethylcytosine in transcription and DNA methylation fidelity. *Nature* **473**: 343–348.](http://paperpile.com/b/GrusFK/NCEoW)

[Yu M, Hon GCC, Szulwach KEE, Song C-X, Zhang L, Kim A, Li X, Dai Q, Shen Y, Park B, et al. 2012. Base-resolution analysis of 5-hydroxymethylcytosine in the mammalian genome. *Cell* **149**: 1368–1380.](http://paperpile.com/b/GrusFK/soZ5D)
