# Supplementary material for: Nondestructive enzymatic deamination enables single-molecule long-read amplicon sequencing for the determination of 5-methylcytosine and 5-hydroxymethylcytosine at single-base resolution
Source: HighWire-hosted journal article supplement (doi:10.1101/gr.265306.120), 2021-01-19
Supplement: Supplemental_Text_S3.docx [file Supplemental_Text_S3.docx]

**Supplemental Text S3: PCR amplification bias**

In order to understand if enzymatic deamination treatment would cause additional PCR bias during library amplification, we performed the following experiment : We mixed equal amounts of unmodified lambda DNA and fully 5mC modified XP12 phage DNA. Genomic DNA was deaminated using sodium bisulfite vs. enzymatic method followed by PCR amplification. We also performed the control library amplification without enzyme treatment. The enzymatic method produced similar quantification of unmethylated and methylated reads as in the control library. On the other hand, the bisulfite method resulted in highly biased quantification toward the methylated copies (Supplemental Fig. S3).
